# Supplementary material for: Oxidized low-density lipoprotein potentiates angiotensin II-induced Gq activation through the AT1-LOX1 receptor complex
Source: eLife. 2025 Mar 25;13:RP98766. doi: 10.7554/eLife.98766 (PMC11936421; doi:10.7554/eLife.98766)
Supplement: Figure 1—source data 1. — Source data for Figure 1a–j. [file elife-98766-fig1-data1.xlsx]

## Sheet: Figure 1a
	IP1 concentration(% of control)
	Ang ll	oxLDL(0μg/mL)				oxLDL(5μg/mL)				oxLDL(10μg/mL)				oxLDL(20μg/mL)
	10-12M	82.5835	117.416	101.869	98.1306	93.9994	98.6687	96.651	110.576	100.79	114.544	80.26	79.6204	75.615	68.8484	88.4519	101.919
	10-11M	85.5125	70.1362	97.3611	100.199	57.8179	58.5654	100.742	90.5438	100.243	94.3583	53.6909	71.8682	61.7667	72.3848	93.1995	104.048
	10-10M	79.8368	95.4633	89.7241	110.476	83.8543	66.2284	85.7341	72.9879	133.993	163.094	86.471	103.564	90.6016	93.0203	117.696	166.955
	10-9M	101.925	109.965	121.415	167.963	95.849	109.829	137.337	149.035	206.302	183.496	201.841	190.353	216.124	198.359	203.134	218.96
	10-8M	204.582	223.716	267.798	281.813	249.289	265.661	347.351	339.318	376.368	397.105	364.957	321.447	325.933	328.945	403.424	380.53
	10-7M	315.131	379.03	389.555	368.032	342.266	473.404	387.516	416.677	393.419	422.723	424.172	465.276	400.471	458.914	374.017	408.887
	10-6M	359.397	416.354	376.039	425.849	352.395	383.409	411.98	392.852	401.033	393.528	363.016	359.193	362.354	389.436	385.721	447.1
	10-5M	330.703	370.93	400.18	418.804	313.613	365.334	474.065	440.816	395.521	403.308	362.328	351.461	322.169	399.955	438.197	456.711

## Sheet: Figure 1b
	IP1 concentration (% of control)
		vehicle					oxLDL
	vehicle	115.945	90.0095	117.077	80.609	96.3592	80.3242	27.6454	111.639	64.5375	101.532	CHO-LOX-1-AT1
	Ang II (10-8M)	245.339	217.32	255.461	258.609	238.159	308.882	313.344	263.403	304.192	274.511
	vehicle	65.7169	102.962	106.279	90.2548	134.788	78.9088	106.142	83.1625	86.9994	50.7989	CHO-AT1
	Ang II (10-8M)	252.872	253.466	280.74	321.885	262.57	224.084	242.387	193.799	228.493	203.684

## Sheet: Figure 1c
	IP1 concentration (% of control)
	vehicle	Ang II (10-8M)	Ang II (10-8 M) + nLDL (10μ/mL)	Ang II (10-8 M) +oxLDL (10μg/mL)
	92.0001	1211.89	1028.78	1325.39
	125.785	1132.02	1186.99	1360.28
	97.1069	1182.03	1195.15	1278.12
	92.3029	1101.69	1214.67	1327.42
	92.8052	1101.83	1259.68	1401.92

## Sheet: Figure 1d
	IP1 concentration (% of control)
	vehicle	Ang ll	Ang II+oxLDL	Ang II+BSA (10 μg/mL)	Ang II+AGE (10 μg/mL)	Ang II+BSA (100 μg/mL )	Ang II+AGE (100 μg/mL)
	184.796	9009.97	11552.9	9416.36	8380.99	10331.8	8522.04
	46.9804	9301.45	10728.3	7456.15	8536.81	9844.1	12664.4
	123.001	8800.47	10714.1	8939.03	7750.48	7953.36	10002.8
	6.39802	9829.05	13572.9	8603.01	9534.5	8331.57	9834.32
	138.825	8157.83	11327.2	5507.76	10832.5	11717.7	9825.13

## Sheet:  Figure 1e
	IP1 concentration(% of control)
		CHO-LOX-1-AT1					CHO-LOX-1-AT1mg
	vehicle	144.173	95.6261	75.7053	83.5879	100.908	102.543	43.1314	38.9565	26.6081	37.3482
	Ang II (10-8M)	224.63	209.717	160.924	169.931	221.572	261.013	177.064	159.36	125.093	224.742
	Ang II (10-8M)+oxLDL (10 μg/mL)	340.898	273.072	236.434	241.93	268.572	297.403	257.002	227.442	286.151	256.788
312.038

## Sheet: Figure 1f
	IP1 concentration(% of control)
		vehicle					PTX					Gq inhibitor					RKI-1447
	vehicle	120.546	102.476	88.3655	93.5433	95.0694	95.8804	84.3488	86.3945	95.8307	116.009	104.37	95.09	72.7488	81.5847	78.5149	85.3312	71.5148	49.0996	92.9781	100.883
	Ang II	255.924	206.387	232.567	224.293	241.792	275.375	261.434	274.075	235.022	265.539	111.96	100.139	99.2866	75.9493	105.088	233.303	221.752	234.484	228.077	209.119
	Ang II+oxLDL	275.978	262.307	277.447	239.657	277.713	356.453	314.232	333.832	288.68	346.145	81.6114	72.1715	84.2927	63.3026	94.4935	320.055	270.609	278.903	293.994	338.295

## Sheet: Figure 1g
	Change from baseline (F340/F380 ratio)
	oxLDL						Ang ll (10-12M)									Ang ll (10-12M) + oxLDL (5μg/mL)
	0	0	0	0	0		0	0	0	0	0	0	0	0		0	0	0	0	0	0	0	0
	7.2657	-0.00285	0.0023	-0.0039125	-0.002325		7.2575	-0.0016428	-0.0060778	-0.0014625	-0.0034	-0.008086	0.006293	-0.009973		7.2575	-0.0001875	-0.0018	-0.0051334	0.0017111	-0.00765	-0.0055	-0.0017
	14.5317	-0.000725	0.004425	-0.005225	-0.0004375		14.5135	-0.0004857	-0.0057889	-0.0012875	-0.0027444	0.0055	0.00856	-0.001793		14.5135	-0.0019875	0.003475	-0.0069889	0.0011778	-0.00735	-0.0141	-0.01282
	21.7967	-0.0038	0.006525	0.005025	-0.006025		21.7705	-2.86e-05	-0.0168889	-0.00845	-0.0043556	0.007685	-0.065534	-0.04372		21.7705	0.0009	0.0120875	0.0040333	-0.0039556	-0.00425	-0.0611	-0.05858
	29.0627	-0.059475	-0.05535	-0.008225	-0.05285		29.0275	-0.0050143	-0.0103667	-0.0055625	-0.0122222	-0.077157	-0.05032	-0.035553		29.0275	-0.0047375	0.007775	-0.0112334	-0.0113334	-0.016083	-0.0478	-0.04194
	36.3277	-0.020375	-0.0425	-0.0635875	-0.0698625		36.2835	-0.0489429	-0.0084223	-0.0298375	-0.0221667	-0.073472	-0.037314	-0.02392		36.2835	-0.00205	-0.0645375	-0.0116556	-0.0384111	-0.102583	-0.048	-0.03732
	43.5937	-0.0297	-0.029225	-0.0546625	-0.0392125		43.5405	-0.0347572	-0.0088223	-0.0088	-0.0190111	-0.0604	-0.005374	-0.030346		43.5405	-0.0422875	0.0452375	-0.0127667	-0.0121111	-0.132933	-0.0358	-0.02222
	50.8587	-0.023575	-0.01595	-0.051125	-0.032		50.7975	-0.0291143	-0.0082445	-0.0068	-0.0247111	-0.049215	0.019553	-0.029093		50.7975	-0.044275	0.183138	-0.0411223	0.186189	-0.089116	-0.0426	0.09958
	58.1247	-0.016525	-0.00985	-0.0317875	-0.0382875		58.0535	-0.0308	0.0017222	-0.011275	-0.0172666	-0.037672	0.036773	-0.028513		58.0535	-0.04285	0.193887	-0.0444001	0.251333	0.166417	-0.0039	0.19014
	65.3897	-0.016225	0.018275	-0.0247	-0.032625		65.3105	-0.0273143	0.0047222	-0.0052625	-0.0122	-0.030315	0.053846	-0.028146		65.3105	-0.0424	0.178262	0.201488	0.202956	0.237167	0.2852	0.26256
	72.6557	-0.01005	0.001825	-0.02065	-0.03275		72.5675	-0.0232428	0.0086888	-0.008875	-0.0097333	-0.022543	0.06574	-0.021726		72.5675	-0.0390625	0.137901	0.255277	0.170533	0.43125	0.2924	0.36994
	79.9207	-0.008675	-0.0092	-0.0189625	-0.0271375		79.8235	-0.0219571	0.0109666	-0.0016875	-0.0104333	-0.015157	0.065273	-0.007133		79.8235	-0.035825	0.0938375	0.248422	0.1314	0.425267	0.3154	0.37212
	87.1867	-0.006175	-0.017625	-0.0187	-0.025725		87.0805	-0.0229857	0.0124555	-0.0038375	-0.0117667	-0.0086	0.072853	0.01466		87.0805	-0.0352875	0.05695	0.208311	0.0694889	0.363234	0.2634	0.32426
	94.4517	-0.003975	-0.02005	-0.0162625	-0.0241125		94.3375	-0.0148286	0.0140111	-0.0053625	-0.0097333	-0.008386	0.07626	0.01652		94.3375	-0.029175	0.0334375	0.162089	0.0128444	0.291984	0.2085	0.2349
	101.718	-0.0032	-0.02145	-0.0124375	-0.0240875		101.594	-0.0136286	0.0130666	-0.007475	-0.0108333	-0.000643	0.076606	0.01754		101.594	-0.0238875	0.0160875	0.103544	-0.016	0.206834	0.1825	0.18732
	108.983	0.00035	-0.01975	-0.01325	-0.02295		108.85	-0.0123714	0.0122111	-0.0072875	-0.0090333	0.003985	0.05992	0.02064		108.85	-0.016125	0.0036875	0.0578444	-0.0257555	0.067317	0.1562	0.13442
	116.249	-0.0023	-0.017825	-0.0087875	-0.0228		116.108	-0.0082857	0.0167333	-0.0084625	-0.0085666	0.003743	0.050126	0.020754		116.108	-0.0152125	-0.00645	0.0284444	-0.0223	-0.0274	0.1258	0.10532
	123.514	-0.003725	-0.016475	-0.0056625	-0.019825		123.365	-0.0066	0.0122	-0.0037875	-0.0083667	0.001785	0.0441	0.015734		123.365	-0.0127125	-0.01075	0.0052555	-0.0206778	-0.0711	0.0755	0.07712
	130.78	-0.0015	-0.01365	-0.0072375	-0.019775		130.62	-0.0058	0.0114888	-0.0044	-0.0062889	0.007057	0.047973	0.013007		130.62	-0.0087625	-0.0108375	-0.0100667	-0.0234778	-0.071266	0.044	0.06224
	138.045	-0.0047	-0.013325	-0.0041125	-0.02105		137.877	-0.0072857	0.0104778	-0.00235	-0.0080667	0.009314	0.043666	0.016214		137.877	-0.011025	-0.0154625	-0.0161001	-0.0144	-0.092266	0.0218	0.05056
	145.311	-0.0029	-0.014175	-0.0019625	-0.016825		145.135	-0.0072429	0.0119	-0.0043625	-0.0064444	0.007685	0.050266	0.015207		145.135	-0.0108125	-0.0216375	-0.0163889	-0.0132667	-0.0887	0.0068	0.04602
	152.576	-0.00205	-0.012575	0.0003	-0.0175125		152.391	-0.0087428	0.0114555	-0.0005875	-0.0075889	0.007543	0.04082	0.012767		152.391	-0.0113375	-0.0246375	-0.0178778	-0.0073111	-0.087683	-0.0043	0.04546
	159.842	0.00385	-0.009775	0.0002875	-0.017025		159.648	-0.0085572	0.0123777	-0.002425	-0.0110111	0.006114	0.031133	0.015067		159.648	-0.0116	-0.0231125	-0.0119556	-0.0059334	-0.095066	-0.0024	0.04816
	167.107	0.0018	-0.00665	0.0023125	-0.0145875		166.905	-0.0074714	0.0114333	-0.0041375	-0.0086666	0.018571	0.029166	0.021674		166.905	-0.012325	-0.023125	-0.0069112	0.0021555	-0.094833	0.0022	0.04852
	174.373	0.002725	-0.0092	0.0039	-0.0146125		174.161	-0.0064286	0.0123555	-0.0027125	-0.0091889	0.014585	0.018493	0.024074		174.161	-0.0120875	-0.016225	-0.0049889	0.0021555	-0.09295	0.019	0.05558
	181.638	0.000925	-0.00365	0.0006875	-0.016875		181.417	-0.0050714	0.0120555	-0.001725	-0.0079666	0.021871	0.018106	0.02656		181.417	-0.0096375	-0.0108125	-0.0011112	0.0012222	-0.09055	-0.0071	0.02934
	188.904	-0.00075	-0.003225	0.00305	-0.0178		188.674	-0.0059715	0.0115888	-0.00445	-0.0095555	0.022314	0.01466	0.02962		188.674	-0.0121	-0.00445	0.0017666	0.0023222	-0.08405	-0.0057	0.0261
	196.169	-0.00105	-0.003175	0.0029	-0.01735		195.931	-0.0042143	0.0122222	-0.0026875	-0.0081889	0.026814	0.027473	0.030987		195.931	-0.010575	0.003375	0.0011111	0.0030667	-0.061033	0.0149	0.04586
	203.435	-0.00125	0.001325	0.00105	-0.0155875		203.188	-0.0036	0.0120666	-0.002775	-0.0082444	0.026357	0.02892	0.037194		203.188	-0.0100125	0.0135625	0.0068	0.0032	0.037984	0.0141	0.03616
	210.7	0.003775	0.004825	0.005475	-0.0111875		210.445	-0.0023143	0.0127444	-0.001775	-0.0081111	0.033971	0.036766	0.038354		210.445	-0.011125	0.0187125	0.0050888	0.0039222	0.06065	0.0143	0.02988
	217.966	0.007725	0.0047	0.0064625	-0.0145125		217.702	-0.0043571	0.0144555	-0.0025625	-0.0108889	0.027071	0.03164	0.041127		217.702	-0.0112625	0.0224875	0.0071333	0.0053111	0.050017	-0.002	0.0139
	225.231	0.001825	0.007875	0.007225	-0.0108125		224.958	-0.0030857	0.0132	-0.0019875	-0.0109667	0.028343	0.035286	0.040974		224.958	-0.0117375	0.0244375	0.009	0.0052222	0.0543	-0.0053	0.0088
	232.497	0.00495	0.00715	0.007	-0.011175		232.214	-0.0019428	0.0141555	0.001325	-0.0103222	0.032243	0.030593	0.047734		232.214	-0.0110625	0.0231625	0.0082666	0.0027111	0.053034	0.0115	0.0147
	239.762	0.0048	0.00765	0.0067375	-0.013325		239.471	-0.0027428	0.0146555	0.001075	-0.0103111	0.030714	0.033986	0.05036		239.471	-0.013125	0.0254125	0.0077333	0.0021889	0.0457	-0.0129	-0.00304
	247.028	0.004775	0.010675	0.01135	-0.0102375		246.727	-0.0020285	0.0122111	-0.002375	-0.0100111	0.0272	0.03352	0.054507		246.727	-0.012575	0.02615	0.0094777	0.0014222	0.033717	0.0047	-6e-05
	254.293	0.010225	0.0106	0.0104375	-0.008375		253.984	-0.0019857	0.0105111	0.0002625	-0.0090889	0.023457	0.02636	0.050227		253.984	-0.01245	0.02325	0.0075666	0.0033889	0.036984	-0.0103	-0.00566
	261.559	0.01015	0.0128	0.0128875	-0.00675		261.241	-0.0022857	0.0096555	3.75e-05	-0.0116889	0.0291	0.050333	0.052447		261.241	-0.0132375	0.0274	0.0072444	0.0034	0.019617	-0.0026	-0.01356
	268.824	0.009575	0.01165	0.0126375	-0.00765		268.498	-0.0033857	0.0109444	0.0023125	-0.0126	0.031485	0.054313	0.054627		268.498	-0.0121	0.0255375	0.0081444	0.0045222	0.016884	-0.0052	-0.01496
	276.09	0.00135	0.01475	0.01195	-0.0071875		275.755	-0.0024143	0.0095111	0.00085	-0.0104222	0.032514	0.034733	0.05654		275.755	-0.011775	0.0259375	0.0068333	0.0036667	0.025034	-0.0065	-0.01906
	283.355	0.006375	0.0162	0.0114375	-0.006525		283.012	-0.0030143	0.0091333	-0.0007	-0.0107333	0.063043	0.0456	0.05944		283.012	-0.0114	0.0260875	0.0052333	0.0025333	0.0712	-0.0096	-0.02482
	290.621	0.010175	0.013375	0.0134625	-0.0068625		290.269	-0.0064143	0.0103888	-0.00115	-0.0099111	0.081914	0.051573	0.0578		290.269	-0.012725	0.0259375	0.0039	-0.0006	0.070667	-0.013	-0.02096
	297.886	0.009525	0.01025	0.0119	-0.0027625		297.524	-0.0055	0.0094777	-0.000125	-0.0122111	0.038357	0.05764	0.059527		297.524	-0.013	0.0264875	0.0052333	0.0014333	0.06045	-0.0175	-0.02112
	304.781

## Sheet: Figure 1h
	%change from baseline (F340/F380 ratio)
	oxLDL	Ang ll (10-12 M)	Ang ll (10-12 M)+oxLDL	Ang ll (10-11 M)	Ang ll (10-11 M)+oxLDL	Ang ll (10-10 M)
	4.54608	5.51908	4.10113	36.6752	45.8287	44.5305
	7.4833	4.5724	28.1439	50.8813	34.1272	25.1494
	4.99763	2.8268	37.3438	48.779	40.1004	36.7809
	4.57124	1.81952	35.1613	48.2258	71.0908	32.5345
		7.39405	20.1221	27.9776	41.8038
		11.6599	46.7226	37.9765
		4.76493	33.5531	24.7534
				43.536

## Sheet: Figure 1i
	%change from baseline (F340/F380 ratio)
	Ang ll	Ang ll+oxLDL	Ang ll+oxLDL+YM-254890
	43.6362	65.6954	21.7584
	17.0977	58.3089	8.4528
	29.9039	54.0296	15.671
	26.5802	58.0777	21.5528

## Sheet: Figure 1j
	%change from baseline (F340/F380 ratio)
	oxLDL	Ang II (10-12M)	Ang II (10-12M)+oxLDL	Ang II (10-11M)	Ang II (10-11M)+oxLDL
	6.9291	17.2772	18.3074	20.3296	28.2577
	7.58534	11.9711	5.21955	38.2535	26.6807
	3.52007	29.3073	19.8748	35.7915	32.6571
	5.39763	10.3956	12.3285	27.3884	21.1012
		11.4935	2.889	15.0626	18.3975
