# Supplementary material for: Oxidized low-density lipoprotein potentiates angiotensin II-induced Gq activation through the AT1-LOX1 receptor complex
Source: eLife. 2025 Mar 25;13:RP98766. doi: 10.7554/eLife.98766 (PMC11936421; doi:10.7554/eLife.98766)
Supplement: Figure 2—source data 1. — Source data for Figure 2a–d. [file elife-98766-fig2-data1.xlsx]

## Sheet: Figure 2a
	%change in puncta
	Green puncta					Red puncta
	Ang II	vehilce	oxLDL	Ang II+oxLDL		Ang II	vehilce	oxLDL	Ang II+oxLDL
	8.33333	-38.141	-10.7143	8.73786		24.2857	46.875	51.0204	-3.57143
	-7.04225	-12.1622	5.45455	32.2581		17.3913	0	12	40.2439
	23.2143	-10.084	18.1818	-12.6214		-8.3871	-5.6962	20.4545	13.1579
	10.2564	-7.18563	28.7356	41.0072		6.86275	-2.85714	28.0702	36.0947
	49.5652	5.074	24.3902	61.194		-27.1186	11.4428	31.4815	16.8224
	2.98507	-68	14.006	10.5263		1.94553	-6.25	28.9206	14.2857
	10.7143	-3.67647	17.8707	78.3784		9.09091	-0.719425	58.4615	36.6667
	8.43882	-27.6163	-7.14286	31.0127		4.86486	-7.97872	35.7143	41.1765
	49.5238	-29.8995	14.9057	37.5587		-64.0523	-33.0275	5.55556	67.8571
	5.86826	-80	9.19932	18.0523		-55.7232	-18.1818	6.75676	3.21101
		43.7908	-4.90094	-12.743			-75.8621	-1.51515	1.70649

## Sheet: Figure 2b
	ΔBRET
	(S)	oxLDL				Ang II				Ang II+oxLDL
	0	0	0	0	0	0	0	0	0	0	0	0	0
	16.904	0.001466	0.004284	0.003595	-0.00115	-0.00989	-0.00884	-0.00911	-0.01702	-0.01028	-0.01237	-0.00242	0.00053
	33.809	0.001467	0.005885	0.009159	-0.00438	-0.00973	-0.01314	-0.00589	-0.02175	-0.01299	-0.01584	-0.01193	-0.00019
	50.717	0.002813	-0.003	0.008044	0.000465	-0.01717	-0.01986	-0.01712	-0.03141	-0.01919	-0.02557	-0.01202	-0.00928
	67.625	0.005298	0.007105	0.007831	0.00264	-0.01247	-0.01319	-0.01428	-0.02941	-0.01953	-0.01883	-0.01297	-0.00909
	84.526	0.00143	-0.00068	0.004525	-0.00013	-0.01601	-0.01812	-0.0192	-0.02592	-0.02288	-0.0223	-0.01404	-0.01356
	101.426	0.002964	0.002859	0.006324	0.001289	-0.0158	-0.01777	-0.01837	-0.02271	-0.02682	-0.02407	-0.01679	-0.01216
	118.329	0.005753	0.005554	0.011679	0.003436	-0.01428	-0.01474	-0.01493	-0.0281	-0.02124	-0.02219	-0.01179	-0.0042
	135.23	-0.00041	0.006763	0.010135	0.000698	-0.01509	-0.01684	-0.01545	-0.02815	-0.02569	-0.02309	-0.00979	-0.01685
	152.133	0.002049	-0.00145	0.002251	-0.00308	-0.01778	-0.0262	-0.02213	-0.03204	-0.02537	-0.02498	-0.01185	-0.01181
	169.033	0.001139	0.004177	0.006101	3.06e-05	-0.01568	-0.01872	-0.02393	-0.02629	-0.02093	-0.02791	-0.01269	-0.01936
	185.931	0.002678	0.004758	0.006394	0.010027	-0.01229	-0.02137	-0.01687	-0.02713	-0.02554	-0.02859	-0.01654	-0.01303
	202.838	0.008505	0.004601	0.01005	0.001379	-0.01164	-0.0209	-0.01638	-0.02942	-0.02416	-0.02675	-0.01485	-0.01404
	219.746	0.003044	0.005815	0.009625	0.004249	-0.0151	-0.02111	-0.01357	-0.037	-0.02362	-0.02144	-0.01817	-0.02032
	236.649	0.001646	0.008651	0.007763	0.000318	-0.02014	-0.02037	-0.01864	-0.03179	-0.02822	-0.02412	-0.01569	-0.01321
	253.56	0.001266	0.008977	0.004667	0.001082	-0.02037	-0.02065	-0.01777	-0.03407	-0.02477	-0.0287	-0.01464	-0.01991
	270.471	0.002941	0.005354	0.011337	0.003915	-0.01902	-0.01961	-0.01895	-0.03687	-0.02398	-0.03041	-0.01906	-0.01555
	287.377	-0.0001	0.004869	0.007327	0.002011	-0.02151	-0.02165	-0.01953	-0.03399	-0.02366	-0.02806	-0.01376	-0.01762
	304.289	0.001281	0.001649	0.006289	0.002801	-0.02241	-0.02233	-0.02113	-0.03812	-0.02728	-0.03219	-0.01931	-0.02096
	321.198	0.007851	0.001288	0.00885	0.004879	-0.01926	-0.02214	-0.0239	-0.03385	-0.02768	-0.02541	-0.01806	-0.01347
	338.107	0.00526	0.007919	0.011104	0.0049	-0.01855	-0.02592	-0.02331	-0.03323	-0.02653	-0.03038	-0.01603	-0.0119
	ΔBRET
	oxLDL	Ang II	Ang II+oxLDL
	0.002917	-0.01621	-0.02302
	0.004268	-0.01917	-0.02466
	0.007653	-0.01752	-0.01412
	0.001769	-0.02991	-0.0128

## Sheet: Figure 2c
	ΔBRET
	(S)	oxLDL				AngII				Ang II+oxLDL
	0	0	0	0	0	0	0	0	0	0	0	0	0
	16.904	-0.00048	-0.0026	0.002753	0.006327	-0.00333	-0.00189	-0.00746	-0.00845	0.002357	-0.01153	-0.00485	-0.00043
	33.809	-0.00677	-0.01098	-0.00406	-0.00108	-0.00651	-0.00574	-0.00083	-0.00886	-0.00231	-0.01434	-0.00922	-0.01566
	50.717	-0.00068	0.000891	0.002758	0.000809	-0.00245	-0.00036	-0.00456	-0.00411	-0.00838	-0.0134	-0.01339	-0.01409
	67.625	0.002109	0.004514	0.004053	0.001274	-0.00514	-0.0031	-0.0071	-0.0075	-0.01207	-0.01467	-0.00851	-0.01071
	84.526	-0.00722	-0.00079	-0.0058	3.69e-05	-0.00545	-0.00958	-0.01065	-0.01133	-0.01034	-0.01442	-0.01852	-0.01057
	101.426	-0.00385	-0.00098	-0.0096	-0.00246	-0.01031	-0.00725	-0.00739	-0.01027	-0.00925	-0.01789	-0.01744	-0.01151
	118.329	-0.00438	0.002727	-0.00669	-0.00075	-0.00337	-0.0067	-0.00653	-0.01287	-0.01031	-0.0252	-0.01722	-0.01169
	135.23	0.000743	0.003611	-0.00215	0.005432	-0.0043	-0.01121	-0.00711	-0.01084	-0.00755	-0.01215	-0.01399	-0.01127
	152.133	0.002282	-3.1e-06	-0.00306	0.006316	-0.0051	-0.00688	-0.00299	-0.01597	-0.00636	-0.01025	-0.01359	-0.00522
	169.033	-0.00286	-0.00201	-0.00442	0.006729	-0.00261	0.000777	-0.00744	-0.00607	-0.01282	-0.01033	-0.0139	-0.01466
	185.931	-0.00474	0.003764	-0.00997	-0.0001	-0.00975	-0.00908	-0.00952	-0.01442	-0.01287	-0.02031	-0.01909	-0.00998
	202.838	0.003439	0.000163	-0.00727	0.000909	-0.00582	-0.00446	-0.00977	-0.00978	-0.00987	-0.0141	-0.01408	-0.01572
	219.746	0.003931	0.009718	-0.00375	0.003088	-0.00418	0.000899	-0.00324	-0.01236	-0.00638	-0.01275	-0.01121	-0.01047
	236.649	0.002325	-0.00269	-0.00258	-6.6e-05	-0.00334	-0.00874	-0.00901	-0.01172	-0.01381	-0.01741	-0.01885	-0.01275
	253.56	0.003212	-0.00273	0.00013	0.010226	-0.00278	-0.00698	-0.00475	-0.00711	-0.0121	-0.01723	-0.01283	-0.0073
	270.471	-0.00031	-0.00389	-0.00846	0.006984	-0.00248	-0.00397	-0.01578	-0.00712	-0.01651	-0.02145	-0.0192	-0.01483
	287.377	-0.00403	-0.00291	-0.00481	-0.01342	-0.01197	-0.00959	-0.01987	-0.01332	-0.0187	-0.02112	-0.0231	-0.02293
	304.289	-0.00562	0.000743	-0.01045	0.000266	-0.00643	-0.00735	-0.00815	-0.01543	-0.01517	-0.01667	-0.0232	-0.01657
	321.198	0.004744	-0.00497	-0.00897	0.006892	-0.00025	-0.00159	-0.01223	-0.01322	-0.00901	-0.02093	-0.0146	-0.01253
	338.107	0.001268	-0.00027	-0.00771	0.005103	-0.00278	-0.00848	-0.01428	-0.00644	-0.00784	-0.01704	-0.02405	-0.01643
	ΔBRET
	oxLDL	Ang II	Ang II+oxLDL
	-0.00084	-0.00492	-0.00996
	-0.00043	-0.00556	-0.01616
	-0.0045	-0.00843	-0.01554
	0.002126	-0.01036	-0.01227

## Sheet: Figure 2d
	ΔBRET
	(S)	Ang II								Ang II+oxLDL								Ang ll+oxLDL+LOX-1-Ab
	0	0	0	0	0	0	0	0	0	0	0	0	0	0	0	0	0	0	0	0	0	0	0	0	0
	16.904	-0.00021	0.005098	0.005144	6.31e-05	0.003486	-0.0132	0.004719	-0.00061	-0.00269	-0.00149	0.00487	-0.00609	-0.00338	-0.00629	-9.8e-05	0.001331	-9.4e-05	0.001232	-0.00236	-0.0037	0.001548	0.006487	-0.00561	-0.00871
	33.809	0.005068	0.004554	-0.00087	-0.00483	0.001075	-0.00247	-0.00018	-0.00503	-0.00576	-0.01216	0.000888	0.003637	-0.01854	-0.00606	-0.00147	-0.00553	-0.00201	-0.0072	0.001423	-0.00275	-0.00428	-0.00213	-0.00121	-0.00597
	50.717	-0.0035	0.001983	0.003782	0.001853	0.000771	-0.00993	0.000952	-0.00739	-0.00642	-0.01238	0.000402	-0.00281	-0.01096	-0.01065	-0.01008	-0.00305	0.001958	-0.00066	0.000669	-0.00484	-0.00488	-0.0044	0.00469	-0.0109
	67.625	-0.00595	-0.00029	-0.00071	-0.00877	-0.00398	-0.01881	-0.002	-0.00124	-0.01178	-0.00734	-0.00228	-0.00726	-0.01307	-0.00607	-0.01118	-0.00433	-0.00158	-0.00325	-0.00539	-0.01002	-0.00881	0.005083	-0.00341	-0.01127
	84.526	-0.00412	0.003553	0.004406	-0.01118	0.000114	-0.01427	-0.00258	-0.0144	-0.01073	-0.01684	-0.0007	-0.01154	-0.01902	-0.0177	-0.00662	-0.01065	0.00085	-0.00116	-0.00474	-0.00603	-0.00868	-0.00232	0.001088	-0.0085
	101.426	-0.00096	-0.0022	-0.00222	-0.00985	0.002449	-0.01362	-0.00045	-0.00791	-0.01234	-0.01165	-0.00832	-0.00844	-0.0196	-0.01962	-0.00525	-0.00996	-0.0006	3.31e-05	-0.00478	-0.00306	0.000302	0.004028	-0.0027	-0.00809
	118.329	-0.00907	-0.00889	-0.00414	-0.00814	-0.00619	-0.01669	-0.00927	-0.00728	-0.0102	-0.01196	9.9e-05	-0.01117	-0.01805	-0.0121	-0.00802	-0.01088	-0.00386	-0.00672	-0.0069	-0.00803	-0.00797	-0.00398	-0.00248	-0.01052
	135.23	-0.00268	-0.00677	-0.00365	-0.00742	-0.00535	-0.01483	-0.01207	-0.01197	-0.01088	-0.01638	-0.00495	-0.00667	-0.02506	-0.01501	-0.0104	-0.0144	-0.00526	-0.00011	-0.00449	-0.00793	-0.00455	0.007221	-0.00239	-0.0174
	152.133	-0.0075	0.006975	-0.00018	-0.01219	0.000568	-0.02132	-0.00976	-0.01229	-0.01212	-0.01194	-0.00506	-0.01895	-0.02012	-0.01893	-0.00883	-0.00775	-0.00583	-0.00568	-0.00287	-0.01081	-0.00811	0.00043	0.00012	-0.00745
	169.033	-0.01026	0.006072	0.001268	-0.00588	-0.00103	-0.01651	-0.00902	-0.01558	-0.00692	-0.0177	-0.00227	-0.01121	-0.02237	-0.01363	-0.01239	-0.01263	-0.00285	-0.00542	-0.00735	-0.00967	-0.00469	0.002179	-0.00735	-0.00845
	185.931	-0.00484	-0.00248	-0.00137	-0.01014	0.003782	-0.01661	-0.00506	-0.00842	-0.01556	-0.02237	-0.00127	-0.00425	-0.02404	-0.01889	-0.01011	-0.01236	-0.00264	-0.00321	-0.00775	-0.01147	-0.00849	0.001616	0.003939	-0.01052
	202.838	-0.00416	-0.00369	-0.00173	-0.00716	-0.00339	-0.01249	-0.00615	-0.0116	-0.0113	-0.01729	-0.00638	-0.00746	-0.02139	-0.01622	-0.01872	-0.01445	0.004781	-0.00887	0.002246	-0.00962	-0.0017	-0.00185	-0.00629	-0.01047
	219.746	-0.00432	-0.00143	-0.00616	-0.01175	-0.00557	-0.01483	-0.00433	-0.01046	-0.00943	-0.01564	-0.00609	-0.01163	-0.02666	-0.01437	-0.01133	-0.01463	-0.00228	0.000256	-0.00791	-0.01065	-0.01087	-0.00316	-0.00297	-0.01541
	236.649	-0.00893	0.001512	-0.00051	-0.01102	-0.00504	-0.0137	-0.01374	-0.01413	-0.0125	-0.00718	-0.00808	-0.01886	-0.0234	-0.01788	-0.01241	-0.01431	-0.00308	-0.00288	-0.00839	-0.00839	-0.008	-0.00803	-0.01213	-0.01127
	253.56	-0.00772	-0.00559	0.00458	-0.00793	-0.00114	-0.01572	-0.00212	-0.01142	-0.01743	-0.01815	-0.00236	-0.00983	-0.01492	-0.01568	-0.01262	-0.01566	-0.00031	-0.00281	-0.00415	-0.01223	-0.01005	-0.00191	-0.00363	-0.01735
	270.471	-0.00624	-0.00644	-0.00792	-0.01154	0.000923	-0.01848	-0.00683	-0.01351	-0.01305	-0.01144	-0.00399	-0.01415	-0.0263	-0.02108	-0.00975	-0.00991	-0.00331	-0.00856	-0.00306	-0.00978	-0.00646	0.002732	-0.00635	-0.01562
	287.377	-0.00789	-0.00534	-0.00019	-0.01526	-0.00732	-0.01492	-0.01138	-0.00717	-0.01402	-0.02157	-0.00633	-0.01286	-0.02375	-0.02221	-0.01125	-0.01635	-0.00692	-0.01077	-0.00099	-0.00555	-0.0019	0.00027	-0.00481	-0.0134
	304.289	-0.01104	-0.00226	-0.00098	-0.00783	-0.00341	-0.01742	-0.00157	-0.01185	-0.00559	-0.0198	-0.00879	-0.00793	-0.01723	-0.02208	-0.01347	-0.01461	-0.00543	-0.0016	-0.00555	-0.00895	-0.01026	0.002941	-0.00515	-0.01511
	321.198	-0.00658	0.004235	-0.00368	-0.00872	-0.00728	-0.01264	-0.00979	-0.01479	-0.01183	-0.01708	-0.0079	-0.00845	-0.03058	-0.01589	-0.01063	-0.01027	-0.00406	-0.00997	-0.00574	-0.0082	-0.00787	-0.00546	-0.01329	-0.00862
	338.107	-0.00493	0.000735	0.000768	-0.00857	0.000387	-0.01964	-0.00289	-0.01147	-0.00549	-0.02057	-0.00821	-0.01401	-0.02563	-0.02047	-0.01757	-0.02156	-0.00527	-0.00515	-0.00103	-0.01202	-0.01173	-0.00533	-0.01267	-0.00821
	ΔBRET
	AngII	Ang II+oxLDL	Ang II +oxLDL +LOX-1-Ab
	-0.0050393	-0.0098119	-0.002276
	-0.0005074	-0.0138537	-0.0039285
	-0.0006828	-0.0036526	-0.0037676
	-0.0079181	-0.0090446	-0.0077955
	-0.0018069	-0.020204	-0.0063723
	-0.014906	-0.0155408	-0.0002797
	-0.0051765	-0.0101105	-0.0041299
	-0.0099267	-0.0110978	-0.0111623
