# Supplementary material for: Oxidized low-density lipoprotein potentiates angiotensin II-induced Gq activation through the AT1-LOX1 receptor complex
Source: eLife. 2025 Mar 25;13:RP98766. doi: 10.7554/eLife.98766 (PMC11936421; doi:10.7554/eLife.98766)
Supplement: Figure 3—figure supplement 1—source data 1. — Source data for Figure 3—figure supplement 1. [file elife-98766-fig3-figsupp1-data1.xlsx]

## Sheet: Figure 3-figure supplement 1
	IP1 concentration (% of control)
	HUVECs			BAECs			HAVSMCs			A10
	veh	Ang ll	Ang ll+oxLDL	veh	Ang ll	Ang ll+oxLDL	veh	Ang ll	Ang ll+oxLDL	veh	Ang ll	Ang ll+oxLDL
	128.698	109.332	76.5507	89.7899	86.1985	59.7546	104.906	122.942	86.4096	146.037	78.8126	121.554
	123.952	84.5363	81.8102	95.4207	81.5156	93.621	77.6428	68.8104	68.9927	76.0567	94.836	78.3838
	72.8545	95.8061	84.3407	103.856	89.3142	83.1001	149.579	102.981	117.687	98.6112	68.0023	49.5166
	98.0732	86.0497	60.9667	105.889	69.8069	92.2301	72.6896	41.3439	51.5166	77.2158	55.2935	65.1666
	76.4225	81.4831	153.604	105.044	97.7576	198.194	95.1816	90.0627	102.523	102.079	65.1573	63.0917
