# Supplementary material for: Oxidized low-density lipoprotein potentiates angiotensin II-induced Gq activation through the AT1-LOX1 receptor complex
Source: eLife. 2025 Mar 25;13:RP98766. doi: 10.7554/eLife.98766 (PMC11936421; doi:10.7554/eLife.98766)
Supplement: Figure 3—figure supplement 2—source data 1. — Source data for Figure 3—figure supplement 2. [file elife-98766-fig3-figsupp2-data1.xlsx]

## Sheet: Figure 3-figure supplement 2
	Relative gene expression normalized to GAPDH
	NRK52E						NRK49F
	AT-1			LOX-1			AT-1			LOX-1
	scramble	siAT1a	siLOX-1	scramble	siAT1a	siLOX-1	scramble	siAT1a	siLOX-1	scramble	siAT1a	siLOX-1
	109.762	37.3497	74.1223	83.4233	83.5587	31.59	91.5781	25.7134	89.6522	104.2	79.1217	18.0636
	111.476	21.2863	140.547	98.6552	97.1848	38.0826	95.2649	22.6535	103.736	82.2758	86.9307	22.0321
	107.584	18.757	101.441	95.9847	115.303	44.2044	112.226	8.39866	116.877	101.31	99.3716	21.5115
	71.178	12.6255	73.2099	121.937	71.2492	35.0984	100.931	0.637476	127.222	112.215	87.5976	16.5486
