# Supplementary material for: Oxidized low-density lipoprotein potentiates angiotensin II-induced Gq activation through the AT1-LOX1 receptor complex
Source: eLife. 2025 Mar 25;13:RP98766. doi: 10.7554/eLife.98766 (PMC11936421; doi:10.7554/eLife.98766)
Supplement: Figure 3—figure supplement 3—source data 1. — Source data for Figure 3—figure supplement 3. [file elife-98766-fig3-figsupp3-data1.xlsx]

## Sheet: Figure 3-figure supplement 3
	%change from baseline (F340/F380 ratio)
	Ang Il	oxLDL(2μg/mL)	Ang II+oxLDL(2μg/mL)	oxLDL(5μg/mL)	Ang ll+oxLDL(5μg/mL)	oxLDL(10μg/mL)	Ang II+oxLDL(10μg/mL)
	3.19672	3.79296	6.11923	9.58778	3.99555	8.29354	7.47081
	1.01361	3.63483	3.88303	17.5068	8.73841	10.0593	11.2503
	6.5175	5.7744	5.12031	10.4962	2.34938	16.1312	12.9567
	6.20895	8.32379	4.0426	5.82803	16.2955	10.2536	15.4979
	5.13672	8.93982	8.45213	8.24244	17.3454	10.4899	10.6791
			13.5634	11.3836	15.5024		8.72444
							11.1285
