# Supplementary material for: Oxidized low-density lipoprotein potentiates angiotensin II-induced Gq activation through the AT1-LOX1 receptor complex
Source: eLife. 2025 Mar 25;13:RP98766. doi: 10.7554/eLife.98766 (PMC11936421; doi:10.7554/eLife.98766)
Supplement: Figure 3—source data 1. — Source data for Figure 3a–h. [file elife-98766-fig3-data1.xlsx]

## Sheet: Figure 3a
	IP1 concentration (% of control)
		vehicle					Gq inhibitor (YM-254890)
	vehicle	92.0368	109.027	100.154	79.7553	119.027	44.5432	37.6033	37.1076	44.4577	58.1181
	oxLDL	69.611	95.9402	95.2896	94.1109	115.139	28.1645	42.5572	83.4042	101.793	71.595
	Ang II	115.301	127.704	131.18	116.756	108.115	41.4435	61.9729	44.6342	52.1849	48.9631
	Ang II+oxLDL	137.503	141.898	131.883	142.171	144.763	47.5627	51.4381	78.57	47.3709	58.3219

## Sheet: Figure 3b
	IP1 concentration (% of control)
		vehicle					Gq inhibitor (YM-254890)
	vehicle	106.93	110.304	90.0547	82.5948	110.116	72.9643	82.2846	91.0885	91.2421	95.1357
	oxLDL	80.5908	118.459	94.8494	126.008	115.388	94.2997	86.0858	120.89	96.1886	104.148
	Ang II	124.436	130.768	110.632	111.015	108.284	80.5053	89.6237	76.6896	106.775	74.1202
	Ang II+oxLDL	145.457	129.824	137.562	140.308	135.3	102.237	133.191	107.82	122.648	84.4899

## Sheet: Figure 3c
	IP1 concentration (% of control)
		scramble					siAT1a					siLOX-1
	vehicle	103.719	96.4691	100.355	100.824	98.6335	76.4359	85.8589	104.338	87.8839	104.281	119.206	108.043	100.512	97.5166	127.29
	Ang II	91.3048	121.088	111.24	96.0014	101.585	82.5024	96.176	102.567	95.8123	119.956	108.292	106.968	90.991	96.2836	109.603
	Ang II+oxLDL	134.14	125.234	122.62	105.903	125.055	111.024	101.764	83.3423	78.5739	99.9292	101.684	101.565	104.433	100.447	132.783

## Sheet: Figure 3d
	IP1 concentration (% of control)
		scramble					siAT1a					siLOX-1
	vehicle	115.059	76.9671	108.36	92.9628	106.651	141.332	147.416	135.888	133.58	153.468	134.589	127.998	128.227	145.19	135.282
	Ang II	141.301	125.88	114.311	125.39	145.402	145.971	147.752	134.044	117.203	139.573	168.425	120.086	143.746	123.307	127.388
	Ang II+oxLDL	152.591	165.321	139.65	168.826	155.865	164.578	146.048	141.593	138.701	143.59	183.47	163.976	138.983	144.915	141.654

## Sheet: Figure 3e
	Change from baseline (F340/F380 ratio)
	(S)	Ang ll										(s)	oxLDL					(s)	Ang ll+oxLDL
	0	0	0	0	0	0	0	0	0	0		0	0	0	0	0		0	0	0	0	0	0
	7.2575	-0.00315	0.000311	0.000311	-0.00873	-0.00091	0.003805	-0.01042	0.00137	0.00284		7.2575	0.007025	-0.00169	0.001856	0.002242		7.2575	0.020225	-0.00908333	-0.00178	0.0033	0.001636
	14.5135	0.012813	-0.00023	0.020967	-0.01154	-0.00306	-0.00085	0.008165	0.01815	-0.0061867		14.5135	0.013925	0.02018	-0.00423	0.013084		14.5135	0.0283	0.0242167	0.002317	0.003672	-0.00069
	21.7705	-0.06474	-0.01762	-0.0339	-0.02923	-0.02968	-0.01637	0.00974	-0.0097	-0.0825933		21.7705	-0.027275	-0.04642	-0.04057	-0.01629		21.7705	0.09125	0.126717	-0.01125	-0.02493	-0.01244
	29.0275	-0.08541	-0.00901	-0.02839	-0.02521	0.005489	0.00199	-0.02307	-0.0128	-0.15256		29.0275	-0.012725	-0.0343	-0.04276	-0.02879		29.0275	0.196475	0.207083	-0.02277	-0.01369	-0.01125
	36.2835	-0.07825	-0.01994	-0.01537	-0.02424	-0.00536	0.0058	0.016015	0.01985	-0.0391533		36.2835	-0.0056	-0.02465	-0.0495	-0.02663		36.2835	0.2184	0.2785	0.137291	0.024944	0.001721
	43.5405	-0.07721	-0.01794	-0.01987	-0.01076	0.0019	0.00275	0.045965	0.02083	0.0282733		43.5405	0.00075	-0.01904	-0.03978	-0.02748		43.5405	0.161075	0.291817	0.384239	0.147811	0.17295
	50.7975	-0.069	-0.01748	-0.01686	-0.00694	-0.01496	0.011075	0.064515	0.0175	0.06224		50.7975	0.008125	-0.01741	-0.01148	-0.01307		50.7975	0.114	0.276717	0.461109	0.213567	0.3267
	58.0535	-0.06649	-0.01444	-0.01213	-0.02661	-0.02008	0.02915	0.08174	0.0169	0.08262		58.0535	0.01875	0.00608	0.029131	-0.01438		58.0535	0.09275	0.261067	0.459817	0.183183	0.367843
	65.3105	-0.05885	-0.01356	-0.01154	-0.02059	-0.02648	0.01775	0.081325	0.02001	0.0834733		65.3105	0.01975	0.01965	0.05435	0.011526		65.3105	0.073825	0.228033	0.390439	0.133	0.304571
	72.5675	-0.05394	-0.00552	-0.00877	-0.02616	-0.03053	0.01909	0.079145	0.02295	0.0825667		72.5675	0.0276	0.02603	0.038838	0.008137		72.5675	0.079825	0.227367	0.301735	0.076778	0.219143
	79.8235	-0.04957	-0.00627	-0.00224	-0.0187	-0.02722	0.01934	0.076865	0.01812	0.09886		79.8235	0.033875	0.02476	0.015731	0.007258		79.8235	0.070075	0.2274	0.220465	0.033422	0.123957
	87.0805	-0.04591	-0.00772	-0.0018	-0.01926	-0.01958	0.023425	0.069885	0.02205	0.111853		87.0805	0.04755	0.02365	0.008687	0.005574		87.0805	0.069025	0.25035	0.212078	0.032611	0.1003
	94.3375	-0.04378	-0.00284	0.000456	-0.01746	-0.0308	0.02763	0.067535	0.02944	0.123027		94.3375	0.04905	0.02248	-0.00035	-0.0111		94.3375	0.063575	0.247883	0.2123	0.03695	0.082514
	101.594	-0.03877	-0.00519	0.002022	-0.01733	-0.03156	0.028435	0.05814	0.02541	0.113307		101.594	0.048225	0.01323	-0.00148	0.012853		101.594	0.067025	0.2588	0.208039	0.0384	0.076536
	108.85	-0.03604	-0.00594	0.0049	-0.01884	-0.02751	0.027775	0.0647	0.03318	0.116407		108.85	0.04885	0.018	-0.00378	0.011484		108.85	0.06565	0.273783	0.195735	0.055339	0.077686
	116.108	-0.03708	-0.00662	0.006522	-0.01556	-0.02587	0.0354	0.057115	0.03427	0.119447		116.108	0.0563	0.01868	-0.00921	0.010816		116.108	0.069125	0.265467	0.174261	0.077494	0.0719
	123.365	-0.03434	0.004411	0.009111	-0.01933	-0.03284	0.03968	0.065985	0.03197	0.122727		123.365	0.056625	0.02821	-0.00368	0.015821		123.365	0.065075	0.259217	0.163639	0.124456	0.067507
	130.62	-0.03133	0.000244	0.007156	-0.02069	-0.03239	0.04498	0.06308	0.0467	0.1246		130.62	0.0621	0.0215	-0.00122	0.019595		130.62	0.073775	0.271417	0.156135	0.169989	0.066357
	137.877	-0.03364	-0.00232	0.009967	-0.02079	-0.03421	0.04637	0.063585	0.04213	0.131873		137.877	0.0665	0.02852	-0.00291	0.013132		137.877	0.07285	0.27045	0.159513	0.167994	0.073357
	145.135	-0.03492	-0.00638	0.006556	-0.01986	-0.0331	0.051525	0.057735	0.0479	0.12424		145.135	0.0675	0.03197	0.000462	0.023753		145.135	0.0723	0.28675	0.147761	0.145111	0.070371
	152.391	-0.0348	0.000411	0.004644	-0.0163	-0.01704	0.05448	0.06242	0.05734	0.122327		152.391	0.072275	0.03405	-0.00391	0.014479		152.391	0.06895	0.28735	0.146209	0.123089	0.0707
	159.648	-0.03579	-0.00163	0.007933	-0.0151	-0.01571	0.059315	0.05859	0.05469	0.128013		159.648	0.077725	0.03582	-0.00166	0.011074		159.648	0.0792	0.2846	0.146604	0.116689	0.072193
	166.905	-0.03699	0.001067	0.005678	-0.02226	-0.01554	0.054925	0.05473	0.05635	0.12784		166.905	0.0774	0.03396	0.003462	0.016974		166.905	0.075175	0.2878	0.143352	0.105017	0.074207
	174.161	-0.03819	0.005067	0.0078	-0.01714	-0.01584	0.060535	0.06309	0.06552	0.13274		174.161	0.080025	0.06123	-0.00292	0.013295		174.161	0.079925	0.2982	0.143065	0.108789	0.076157
	181.417	-0.03825	0.003789	0.0078	-0.01769	-0.01679	0.058555	0.066885	0.06261	0.136133		181.417	0.087125	0.05309	0.002269	0.017063		181.417	0.089525	0.303967	0.1425	0.104139	0.07205
	188.674	-0.03843	0.003122	0.010222	-0.01736	-0.01461	0.059015	0.06592	0.06908	0.136907		188.674	0.086275	0.05219	-0.00112	0.015105		188.674	0.081975	0.30625	0.147209	0.100822	0.077071
	195.931	-0.03825	0.001211	0.008156	-0.01953	-0.01602	0.06108	0.069805	0.06914	0.13728		195.931	0.086125	0.05297	0.0023	0.016953		195.931	0.07955	0.303433	0.150083	0.096739	0.08025
	203.188	-0.03973	0.000567	0.011544	-0.01876	-0.01516	0.064145	0.074135	0.06462	0.138973		203.188	0.092775	0.05583	0.001575	0.017095		203.188	0.103325	0.30195	0.145187	0.099517	0.081979
	210.445	-0.03984	0.000867	0.009967	-0.01623	-0.01419	0.061075	0.072715	0.0755	0.1414		210.445	0.09785	0.06827	-0.00271	0.016895		210.445	0.09475	0.3074	0.131622	0.095106	0.079593
	217.702	-0.04157	-0.00026	0.014522	-0.01761	-0.01486	0.05844	0.074565	0.07226	0.13944		217.702	0.09865	0.04863	0.001619	0.0228		217.702	0.0956	0.313717	0.1232	0.10595	0.094329
	224.958	-0.03962	0.001767	0.015522	-0.0204	-0.01314	0.06001	0.075335	0.07623	0.132973		224.958	0.102425	0.06181	8.75e-05	0.024247		224.958	0.096	0.331433	0.113274	0.100128	0.0836
	232.214	-0.04195	0.003556	0.015733	-0.01781	-0.01447	0.05932	0.07112	0.07659	0.1338		232.214	0.1039	0.06605	0.003469	0.025858		232.214	0.101825	0.326767	0.113409	0.104911	0.089021
	239.471	-0.04171	0.0031	0.013467	-0.01609	-0.01304	0.063495	0.076295	0.07405	0.135727		239.471	0.112425	0.05819	0.006069	0.026621		239.471	0.108175	0.3114	0.112752	0.098217	0.086043
	246.727	-0.04103	0.002156	0.019767	-0.0223	-0.01487	0.057495	0.081365	0.07084	0.12728		246.727	0.114	0.0605	0.011375	0.026126		246.727	0.09555	0.31795	0.11453	0.099117	0.0896
	253.984	-0.041	0.001589	0.022089	-0.01697	-0.01431	0.064575	0.08251	0.07311	0.126953		253.984	0.11305	0.05948	0.012444	0.029311		253.984	0.103275	0.3378	0.104987	0.093589	0.092986
	261.241	-0.03974	0.0023	0.020256	-0.02007	-0.01592	0.061415	0.074865	0.07252	0.130067		261.241	0.115075	0.06604	0.012231	0.029342		261.241	0.103525	0.340483	0.112026	0.09065	0.099907
	268.498	-0.03956	0.002367	0.020878	-0.01786	-0.01449	0.06172	0.08146	0.07889	0.125813		268.498	0.119025	0.06811	0.015188	0.029642		268.498	0.0773	0.34795	0.116861	0.090011	0.094979
	275.755	-0.041	0.002978	0.018533	-0.0202	-0.01817	0.05808	0.07455	0.07463	0.126593		275.755	0.11495	0.0709	0.011906	0.028216		275.755	0.11405	0.326933	0.115783	0.093511	0.10075
	283.012	-0.04081	0.005011	0.019156	-0.0193	-0.0186	0.0587	0.072225	0.073	0.121233		283.012	0.12115	0.07558	0.007506	0.030537		283.012	0.095225	0.338017	0.11553	0.090511	0.099829
	290.269	-0.03999	0.005011	0.016622	-0.01676	-0.01667	0.05888	0.068525	0.07829	0.117627		290.269	0.127025	0.07663	0.010256	0.029437		290.269	0.100775	0.343333	0.112809	0.09325	0.094757
	297.524	-0.03999	0.002056	0.016622	-0.01676	-0.01667	0.06047	0.06856	0.08311	0.124		297.524	0.13225	0.07857	0.0126	0.022747		297.524	0.1053	0.358583	0.113409	0.094761	0.095157
								0.066235	0.07902	0.12006
								0.06442	0.07912	0.117587
								0.066985	0.08141	0.113847
								0.06223	0.08278	0.118713
								0.068545	0.08071	0.11084
								0.0638	0.07854	0.109033
								0.069475	0.07915	0.114807
								0.066915	0.07929	0.11056
								0.067425	0.07359	0.106767
								0.07149	0.07888	0.107073
								0.073405	0.07786	0.105627
								0.07273	0.0826	0.1017
								0.0725	0.07579	0.1019
								0.064055	0.07376	0.0981733
								0.0747	0.07799	0.0981467
								0.0778	0.07868	0.0975333
								0.069885		0.09754

## Sheet: Figure 3f
	%change from baseline (F340/F380 ratio)
	Ang II	oxLDL (2μg/mL)	oxLDL( 2 μg/mL)+Ang II	oxLDL(5μg/mL)	oxLDL(5μg/mL)+Ang II
	8.65592	7.94373	24.2478	26.487	26.8249
	11.5292	6.93241	22.8356	19.9535	27.8933
	10.3503	11.7705	55.2151	27.8771	76.3914
	22.7844	4.45996	26.3749	9.51246	29.6301
	2.47055		51.6501		23.3101
	4.68542
	4.89333
	3.21206
	4.08005

## Sheet: Figure 3g
	%change from baseline (F340/F380 ratio)
	oxLDL	Ang ll+oxLDL
	siscramble	scramble	siAT1a	siLOX-1
	3.6718	29.2064	6.15151	19.7956
	3.03253	38.5842	3.56497	3.77482
	1.12008	33.3443	15.1254	22.5521
		14.8248	5.57084	8.16669
		21.5654	9.93575	12.7187
		19.1859	20.541	26.3351
		38.8489	13.1478	10.9246

## Sheet: Figure 3h
	%change from baseline (F340/F380 ratio)
	Ang ll+oxLDL
	vehicle	YM-254890	Irbesartan
	18.9755	4.24416	5.61893
	32.1861	3.72844	1.96985
	27.293	2.16811	1.98097
	20.7864	4.28239	8.76096
