# Supplementary material for: Oxidized low-density lipoprotein potentiates angiotensin II-induced Gq activation through the AT1-LOX1 receptor complex
Source: eLife. 2025 Mar 25;13:RP98766. doi: 10.7554/eLife.98766 (PMC11936421; doi:10.7554/eLife.98766)
Supplement: Figure 4—source data 1. — Source data for Figure 4a–f. [file elife-98766-fig4-data1.xlsx]

## Sheet: Figure 4a
	Relative gene expression normalized to GAPDH
	p67phox					p91phox
	vehicle	Ang II	oxLDL	Ang II+oxLDL		vehicle	Ang II	oxLDL	Ang II+oxLDL
	81.8261	119.171	120.806	200.426		89.6824	130.888	116.572	158.969
	101.511	141.561	164.092	390.911		132.793	115.482	119.993	164.977
	111.813	151.816	144.332	258.933		74.4771	140.312	148.475	252.022
	104.85	137.73	97.4066	198.011		103.047	163.135	127.304	172.423
	Fibronectin					Collagen-1
	vehicle	Ang II	oxLDL	Ang II+oxLDL		vehicle	Ang II	oxLDL	Ang II+oxLDL
	94.1337	137.669	106.391	148.65		63.2615	132.44	113.906	196.495
	99.5486	165.116	118.633	158.622		101.688	154.781	149.65	184.57
	99.9828	150.442	98.5624	172.262		137.305	148.027	203.976	277.954
	106.335	164.567	120.292	169.729		97.7458	163.326	176.591	190.696
	Collagen-4					TGF-β
	vehicle	Ang II	oxLDL	Ang II+oxLDL		vehicle	Ang II	oxLDL	Ang II+oxLDL
	58.8925	140.716	120.169	221.404		159.711	131.339	76.6493	300.391
	98.1896	148.292	146.711	252.723		57.0162	96.3029	157.622	181.252
	128.621	146.582	203.051	355.917		67.3809	149.924	204.614	304.243
	114.296	153.275	189.541	220.283		115.892	145.968	62.9327	370.227
	IL-6					TNF-α
	vehicle	Ang II	oxLDL	Ang II+oxLDL		vehicle	Ang II	oxLDL	Ang II+oxLDL
	82.7716	83.8687	99.2533	286.385		92.5873	86.7742	107.695	233.074
	104.106	99.0387	95.4364	585		98.9169	123.913	112.487	450
	95.8136	115.707	113.216	485.167		101.259	176.607	116.433	378.721
	117.308	112.168	177.375	511.576		107.237	125.761	153.859	361.612
	IL1β					MCP-1
	vehicle	Ang II	oxLDL	Ang II+oxLDL		vehicle	Ang II	oxLDL	Ang II+oxLDL
	76.503	84.7986	75.2366	808.7		104.226	135.186	136.104	187.087
	74.1999	111.198	62.3581	1640		96.0969	155.149	142.757	202.396
	77.5474	529.908	181.472	916.282		98.3944	149.337	104.116	261.376
	171.75	190.349	188.002	1085.94		101.283	164.595	145.53	227.893

## Sheet: Figure 4b
	Relative gene expression normalized to GAPDH
	p67phox					p91phox
	vehicle	Ang II	oxLDL	Ang II+oxLDL		vehicle	Ang II	oxLDL	Ang II+oxLDL
	82.3751	107.802	101.015	162.426		112.394	119.293	87.851	75.946
	98.827	160.518	98.0061	180.329		92.0232	132.193	87.6505	106.892
	105.802	103.945	96.8254	181.271		109.792	147.405	80.0887	88.4468
	112.996	130.475	84.3657	215.515		85.791	155.482	146.211	112.573
	Fibronectin					Collagen-1
	vehicle	Ang II	oxLDL	Ang II+oxLDL		vehicle	Ang II	oxLDL	Ang II+oxLDL
	81.2086	102.17	100.473	130.423		80.2365	94.9613	101.526	99.3103
	105.837	68.898	94.0514	114.854		70.6107	98.0038	137.472	83.1005
	103.236	103.443	100.51	109.833		116.663	151.564	94.2357	111.84
	109.719	110.92	101.093	136.16		132.49	128.819	76.2761	162.112
	Collagen-4					TGF-β
	vehicle	Ang II	oxLDL	Ang II+oxLDL		vehicle	Ang II	oxLDL	Ang II+oxLDL
	77.5233	93.6238	109.323	95.7013		90.8104	86.7028	100.864	209.021
	73.1275	104.134	139.379	78.4517		103.607	111.111	100.777	192.062
	113.663	154.571	94.789	112.97		91.7089	138.956	121.23	155.622
	135.686	129.029	78.2794	155.475		113.874	145.542	142.207	213.274
	IL-6					TNF-α
	vehicle	Ang II	oxLDL	Ang II+oxLDL		vehicle	Ang II	oxLDL	Ang II+oxLDL
	78.7022	53.856	63.5939	205.532		76.662	89.2206	73.3594	106.407
	115.382	130.033	72.6542	306.745		72.3251	205.779	100.853	180.35
	107.975	73.9506	36.911	257.665		151.67	67.7691	134.28	174.679
	97.9413	196.221	47.8531	165.271		99.3426	210.561	92.5585	132.662
	IL1β					MCP-1
	vehicle	Ang II	oxLDL	Ang II+oxLDL		vehicle	Ang II	oxLDL	Ang II+oxLDL
	66.4153	55.5257	53.9432	117.805		77.7822	70.9089	84.0856	139.982
	78.2513	186.446	46.7542	207.473		90.8703	142.587	69.4682	215.314
	165.869	112.114	53.2028	231.404		139.978	77.1586	72.2292	137.042
	89.4645	232.341	57.4803	204		91.3698	171.945	73.6184	265.123

## Sheet: Figure 4c
	Relative gene expression normalized to GAPDH
	p67phox					p91phox
	vehicle	Ang II+oxLDL	Gqi	Ang II+oxLDL+Gqi		vehicle	Ang II+oxLDL	Gqi	Ang II+oxLDL+Gqi
	90.7954	130.799	87.1973	100.187		90.4834	148.075	120.85	76.9589
	88.7066	162.154	104.833	107.806		116.878	142.183	121.468	99.7146
	109.321	105.097	110.277	109.884		92.9082	147.753	102.145	106.669
	111.177	168.788	135.368	103.269		99.7305	126.341	119.48	135.504
	Fibronectin					Collagen-1
	vehicle	Ang II+oxLDL	Gqi	Ang II+oxLDL+Gqi		vehicle	Ang II+oxLDL	Gqi	Ang II+oxLDL+Gqi
	115.594	123.093	83.2368	102.216		98.9686	123.195	87.6972	119.721
	96.0642	127.301	99.057	114.093		92.6444	146.698	123.994	134.143
	95.3133	128.123	83.1629	92.1324		110.201	143.857	98.8899	91.8343
	93.0284	163.951	89.3158	96.3126		98.1856	135.596	129.808	82.6184
	Collagen-4					TGF-β
	vehicle	Ang II+oxLDL	Gqi	Ang II+oxLDL+Gqi		vehicle	Ang II+oxLDL	Gqi	Ang II+oxLDL+Gqi
	83.291	91.9586	89.9848	124.385		95.3949	202.118	36.5256	57.0557
	97.8475	144.852	132.519	139.924		87.9551	152.956	101.27	120.389
	113.601	109.702	96.9827	94.3888		141.089	182.596	63.676	72.1661
	105.261	103.746	136.74	86.0233		75.5614	132.247	114.877	134.657
	IL-6					TNF-α
	vehicle	Ang II+oxLDL	Gqi	Ang II+oxLDL+Gqi		vehicle	Ang II+oxLDL	Gqi	Ang II+oxLDL+Gqi
	69.0102	267.663	69.3464	96.9466		98.936	122.83	65.9751	110.553
	96.2471	255.685	93.6115	95.6607		89.1522	99.3617	89.9785	102.871
	125.584	282.695	133.705	106.928		115.726	88.7352	103.98	113.058
	109.159	241.617	181.754	132.222		96.1861	60.9839	127.1	123.499
	IL1β					MCP-1
	vehicle	Ang II+oxLDL	Gqi	Ang II+oxLDL+Gqi		vehicle	Ang II+oxLDL	Gqi	Ang II+oxLDL+Gqi
	77.3804	228.991	62.1723	112.359		109.621	170.973	90.1076	127.943
	93.4672	236.249	91.1629	97.8357		102.535	161.136	96.5878	135.734
	139.186	235.882	127.846	109.838		85.7285	156.67	86.4535	127.368
	89.966	185.25	160.769	123.362		102.116	156.94	92.3907	124.359

## Sheet: Figure 4d
	Relative gene expression normalized to GAPDH
	p67phox					p91phox
	vehicle	Ang II+oxLDL	Gqi	Ang II+oxLDL+Gqi		vehicle	Ang II+oxLDL	Gqi	Ang II+oxLDL+Gqi
	57.8728	225.43	74.6972	148.317		93.5421	115.728	45.005	88.7255
	143.051	229.904	99.8113	165.356		159.163	126.035	50.7455	148.695
	141.269	250.731	137.165	138.451		78.3404	140.392	146.644	75.181
	57.8067	290.956	153.434	88.4976		68.9547	140.556	131.64	69.2762
	Fibronectin					Collagen-1
	vehicle	Ang II+oxLDL	Gqi	Ang II+oxLDL+Gqi		vehicle	Ang II+oxLDL	Gqi	Ang II+oxLDL+Gqi
	139.986	395.208	126.36	50.4238		114.728	197.182	40.1997	70.354
	71.4951	194.188	93.4306	135.322		132.103	177.524	107.288	62.3233
	97.3976	212.263	47.0409	94.039		83.8789	172.802	89.5977	38.917
	91.1218	192.414	57.1355	111.038		69.2897	190.18	82.3508	113.599
	Collagen-4					TGF-β
	vehicle	Ang II+oxLDL	Gqi	Ang II+oxLDL+Gqi		vehicle	Ang II+oxLDL	Gqi	Ang II+oxLDL+Gqi
	83.5316	150.938	114.57	80.8506		118.562	230.658	102.217	85.9672
	82.5445	117.632	96.0259	91.8703		85.3631	203.007	70.8741	164.494
	95.785	119.028	95.321	82.7125		141.118	326.709	121.429	113.444
	138.139	144.797	120.915	82.2872		54.9561	275.916	82.3869	90.9563
	IL-6					TNF-α
	vehicle	Ang II+oxLDL	Gqi	Ang II+oxLDL+Gqi		vehicle	Ang II+oxLDL	Gqi	Ang II+oxLDL+Gqi
	58.9101	218.562	31.3596	69.7705		66.5598	425.92	44.1402	169.054
	64.8135	277.202	65.77	85.2999		66.5378	363.318	239.755	198.968
	215.603	359.852	58.5132	57.2756		231.531	344.594	210.287	240.834
	60.673	126.481	57.3787	69.7866		35.3715	305.239	51.6452	215.889
	IL1β					MCP-1
	vehicle	Ang II+oxLDL	Gqi	Ang II+oxLDL+Gqi		vehicle	Ang II+oxLDL	Gqi	Ang II+oxLDL+Gqi
	114.874	201.923	68.4932	99.0151		107.95	167.987	83.7809	53.1376
	68.6711	177.7	150.757	180.199		87.0421	141.762	90.1746	118.344
	169.984	203.65	185.68	227.17		120.911	150.512	83.3518	116.095
	46.4703	207.293	73.5323	63.1849		84.0971	128.203	81.2609	78.5094

## Sheet: Figure 4e
	Relative gene expression normalized to GAPDH
	p67phox					p91phox
	vehicle	Ang II+oxLDL	Arb	Ang II+oxLDL+Arb		vehicle	Ang II+oxLDL	Arb	Ang II+oxLDL+Arb
	86.1292	88.8094	80.2522	89.9232		118.35	271.065	71.355	99.9775
	137.146	115.087	68.2782	88.7991		114.282	300.499	97.6121	100.979
	103.145	128.473	71.0339	74.9761		98.8496	335.363	83.1906	94.9534
	73.58	126.439	61.576	106.889		68.5177	341.793	69.1716	127.531
	Fibronectin					Collagen-1
	vehicle	Ang II+oxLDL	Arb	Ang II+oxLDL+Arb		vehicle	Ang II+oxLDL	Arb	Ang II+oxLDL+Arb
	94.6579	118.958	87.136	86.071		76.1386	149.11	98.9407	82.6982
	106.968	115.502	83.5085	85.5618		72.4146	117.94	128.154	73.836
	98.3995	109.93	85.5268	77.6893		124.273	158.561	112.465	80.1067
	99.9747	95.0097	77.4483	100.002		127.174	127.786	94.1775	91.0143
	Collagen-4					TGF-β
	vehicle	Ang II+oxLDL	Arb	Ang II+oxLDL+Arb		vehicle	Ang II+oxLDL	Arb	Ang II+oxLDL+Arb
	77.2724	149.235	103.34	85.194		103.259	262.849	84.3289	107.156
	73.2084	116.922	126.136	74.3047		91.0369	282.599	165.826	82.0291
	123.318	162.524	112.789	83.5709		143.321	351.443	139.853	117.985
	126.201	128.463	99.7095	91.5837		62.3832	437.493	83.3447	116.816
	IL-6					TNF-α
	vehicle	Ang II+oxLDL	Arb	Ang II+oxLDL+Arb		vehicle	Ang II+oxLDL	Arb	Ang II+oxLDL+Arb
	95.7924	139.228	121.058	146.453		62.1412	195.234	107.368	71.6415
	120.917	158.888	103.437	123.703		176.405	158.692	72.9193	84.1085
	132.63	179.4	150.158	96.4327		107.162	126.02	73.4845	63.5524
	50.6599	209.147	36.75	144.801		54.2918	283.011	30.9396	78.3003
	IL1β					MCP-1
	vehicle	Ang II+oxLDL	Arb	Ang II+oxLDL+Arb		vehicle	Ang II+oxLDL	Arb	Ang II+oxLDL+Arb
	60.5827	193.499	35.1685	74.8656		96.5445	135.163	82.8547	80.2448
	182.938	238.14	127.448	78.9885		108.467	145.443	90.5564	83.7003
	114.081	270.537	132.404	71.116		97.1652	156.322	101.781	79.3823
	42.3988	290.88	23.6519	55.7559		97.8238	145.356	89.046	106.069

## Sheet: Figure 4f
	Relative gene expression normalized to GAPDH
	p67phox					p91phox
	vehicle	Ang II+oxLDL	Arb	Ang II+oxLDL+Arb		vehicle	Ang II+oxLDL	Arb	Ang II+oxLDL+Arb
	103.564	117.479	108.851	118.536		92.0421	202.718	101.416	121.207
	110.554	187.232	138.228	128.944		113.17	139.232	78.0029	105.988
	76.8092	191.288	109.7	128.752		109.351	179.717	89.9061	114.533
	109.073	173.205	115.438	112.985		85.4367	157.85	107.782	68.776
	Fibronectin					Collagen-1
	vehicle	Ang II+oxLDL	Arb	Ang II+oxLDL+Arb		vehicle	Ang II+oxLDL	Arb	Ang II+oxLDL+Arb
	106.821	118.429	100.425	83.1087		111.506	96.8201	64.4983	129.716
	116.997	178.947	101.567	84.769		113.404	166.652	106.28	94.9965
	85.6416	175.618	107.222	81.9003		103.98	199.045	86.0019	82.9699
	90.5407	158.176	116.174	80.2355		71.1098	130.922	143.349	76.6183
	Collagen-4					TGF-β
	vehicle	Ang II+oxLDL	Arb	Ang II+oxLDL+Arb		vehicle	Ang II+oxLDL	Arb	Ang II+oxLDL+Arb
	106.218	97.3221	122.936	118.241		101.162	134.828	106.207	140.535
	110.916	153.466	91.88	91.0258		134.793	191.332	108.411	100.239
	104.875	180.156	97.6472	84.5386		91.0078	192.267	108.424	85.1256
	77.9904	133.742	99.1307	72.3006		73.0373	155.263	69.4104	109.593
	IL-6					TNF-α
	vehicle	Ang II+oxLDL	Arb	Ang II+oxLDL+Arb		vehicle	Ang II+oxLDL	Arb	Ang II+oxLDL+Arb
	104.186	181.505	93.9877	132.783		84.3488	177.344	85.0749	116.796
	77.2696	144.224	118.583	110.169		103.048	176.543	151.771	78.3983
	81.5536	204.535	53.7333	147.673		97.737	191.594	103.577	170.387
	136.991	189.731	75.5041	141.419		114.866	142.577	120.161	128.197
	IL1β					MCP-1
	vehicle	Ang II+oxLDL	Arb	Ang II+oxLDL+Arb		vehicle	Ang II+oxLDL	Arb	Ang II+oxLDL+Arb
	100.396	112.466	73.5744	77.8073		88.94	126.324	88.3858	108.509
	134.701	166.722	80.7968	66.9919		109.522	121.5	123.3	112.491
	75.5822	142.718	102.51	132.385		108.821	151.721	88.0206	110.938
	89.3207	149.038	126.544	116.551		92.7168	159.482	93.9779	123.871
