# Supplementary material for: Oxidized low-density lipoprotein potentiates angiotensin II-induced Gq activation through the AT1-LOX1 receptor complex
Source: eLife. 2025 Mar 25;13:RP98766. doi: 10.7554/eLife.98766 (PMC11936421; doi:10.7554/eLife.98766)
Supplement: Figure 5—source data 1. — Source data for densitometric analysis in Figure 5a–h. [file elife-98766-fig5-data1.xlsx]

## Sheet: Figure 5a
								Densitometric analysis
								Fold increase (α-SMA/α-tubulin)
								vehicle	Ang II+oxLDL	TGFβ
								85.7987	511.868	531.447
								97.1562	528.717	545.184
								117.045	516.09	597.048

## Sheet: Figure 5b
								Densitometric analysis
								Fold increase(α-SMA/α-tubulin)
								vehicle	Ang II+oxLDL	TGFβ
								124.903	237.729	444.875
								100.674	265.357	583.335
								74.4238	270.003	1018.45

## Sheet: Figure 5c
								Densitometric analysis
								Fold increase(α-SMA/α-tubulin)
								veh	Ang II	oxLDL	Ang II+oxLDL
								107.36	72.588	86.4642	812.807
								113.591	72.816	86.4699	829.656
								79.0493	65.595	205.1	930.392

## Sheet: Figure 5d
								Densitometric analysis
								Fold increase(α-SMA/α-tubulin)
								veh	Ang II	oxLDL	Ang II+oxLDL
								103.438	127.025	88.2792	150.014
								97.2042	97.9577	72.0345	228.881
								99.3577	124.56	80.0219	199.318

## Sheet: Figure 5e
								Densitometric analysis
								Fold increase(α-SMA/α-tubulin)
								veh	Ang II+oxLDL	Gqi	Ang II+oxLDL+Gqi
								121.76	560.208	141.29	221.687
								132.313	588.324	94.6131	230.973
								45.9268	593.757	65.2905	224.065

## Sheet: Figure 5f
								Densitometric analysis
								Fold increase(α-SMA/α-tubulin)
								veh	Ang II+oxLDL	Gqi	Ang II+oxLDL+Gqi
								118.7	231.383	173.143	24.5764
								82.9895	263.859	144.845	151.596
								98.3107	350.006	31.9734	88.0379

## Sheet: Figure 5g
								Densitometric analysis
								Fold increase(α-SMA/α-tubulin)
								veh	Ang II+oxLDL	Arb	Ang II+oxLDL+Arb
								143.58	938.087	25.2609	266.98
								90.8595	548.792	70.4923	261.311
								65.5609	397.523	143	207.738

## Sheet: Figure 5h
								Densitometric analysis
								Fold increase(α-SMA/α-tubulin)
								veh	Ang II+oxLDL	Arb	Ang II+oxLDL+Arb
								181.397	249.913	87.306	23.562
								51.0643	522.436	18.1334	42.4537
								67.5389	331.706	59.4318	36.483
