# Supplementary material for: Oxidized low-density lipoprotein potentiates angiotensin II-induced Gq activation through the AT1-LOX1 receptor complex
Source: eLife. 2025 Mar 25;13:RP98766. doi: 10.7554/eLife.98766 (PMC11936421; doi:10.7554/eLife.98766)
Supplement: Figure 6—source data 1. — Source data for Figure 6a and b. [file elife-98766-fig6-data1.xlsx]

## Sheet: Figure 6a
	BrdU incorporaltion (% of control)
		vehicle					Gq inhibitor (YM-254890)					Irbesartan
	vehicle	98.9288	100.924	95.6706	104.957	99.5194	87.8711	96.139	92.4327	100.578	96.4444	90.8647	92.5956	103.49	91.2923	94.6117
	Ang II	110.231	120.046	117.705	119.374	116.91	86.4457	104.529	90.6406	102.024	102.35	108.805	103.898	107.95	99.5805	94.1025
	oxLDL	78.9109	82.9023	83.9816	86.2013	79.196	64.5339	70.9486	80.2753	75.9785	85.2034	80.7233	83.8798	88.9504	92.0865	84.5925
	Ang II+oxLDL	121.961	144.137	148.393	141.755	124.486	72.3333	84.6129	71.8853	93.064	87.1177	82.4543	85.2238	105.486	102.981	97.6052

## Sheet: Figure 6b
	BrdU incorporaltion (% of control)
		scramble					siAT1					siLOX-1
	vehicle	96.6015	83.1929	113.951	109.653	96.6015	106.711	108.725	104.784	82.1648	119.506	89.9329	102.727	99.7287	85.0064	110.767
	Ang II	125.918	141.225	124.661	120.862	137.755	110.224	101.399	94.5166	113.58	118.635	125.261	141.839	125.332	130.744	117.35
	oxLDL	74.8536	76.5101	82.2362	97.6724	90.604	96.0017	99.9	100.543	107.954	106.154	94.8165	103.827	102.97	86.7057	94.0311
	Ang II+oxLDL	160.031	161.931	151.821	169.999	172.512	100.9	110.138	116.236	126.046	102.356	131.087	134.3	122.705	150.478	129.088
