# Supplementary material for: Oxidized low-density lipoprotein potentiates angiotensin II-induced Gq activation through the AT1-LOX1 receptor complex
Source: eLife. 2025 Mar 25;13:RP98766. doi: 10.7554/eLife.98766 (PMC11936421; doi:10.7554/eLife.98766)
Supplement: Figure 7—figure supplement 1—source data 1. — Source data for Figure 7—figure supplement 1. [file elife-98766-fig7-figsupp1-data1.xlsx]

## Sheet: Figure 7-figure supplement 1
	Plasma LOX-1 ligand Concentration
	ND+Ang ll	HFD+Ang ll
	0	71.62
	0	31.17
	0	90.79
	0	78.77
	0	70.22
	0	0
	0	0
