# Supplementary material for: Oxidized low-density lipoprotein potentiates angiotensin II-induced Gq activation through the AT1-LOX1 receptor complex
Source: eLife. 2025 Mar 25;13:RP98766. doi: 10.7554/eLife.98766 (PMC11936421; doi:10.7554/eLife.98766)
Supplement: Figure 7—figure supplement 2—source data 1. — Source data for Figure 7—figure supplement 2a–g. [file elife-98766-fig7-figsupp2-data1.xlsx]

## Sheet: Figure 7-figure supplement 2a
	Body Weight at the end of infusion period (g)
	Ang ll0.7γ								Ang ll0.1γ
	WT				LOX-1 KO				WT				LOX-1 KO
	ND+saline	HFD+saline	ND+Ang ll	HFD+Ang ll	ND+saline	HFD+saline	ND+Ang ll	HFD+Ang ll	26.9	26.5	26.7	27.9	25.2	24.7	26.7	27.9
	26.9	26.5	28.8	27.7	25.2	24.7	26.6	25	26.9	26.1	26.3	27.8	30.2	26.5	26.3	27.8
	26.9	26.1	31.9	30.1	30.2	26.5	28.6	22.4	28.5	29.1	26.2	27.1	29.4	19	26.2	27.1
	28.5	29.1	32.9	21.7	29.4	19	25.9	24.5	28.7	27.5	28.9	25.8	27.1	24.7	28.9	25.8
	28.7	27.5	27.7	25.7	27.1	24.7	23.1	25	30.5	29.2	24.8	24.6	26.7	24.6	24.8	24.6
	30.5	29.2	29.7	25.4	26.7	24.6	27	23.7	28.9	29.7	26.2	25.3	23.3	26.7	26.2	25.3
	28.9	29.7	30.1	28.2	23.3	26.7	28.5	25.1	33.7	25.5	28.6	25.7	25.6	26.3	28.6	25.7
	33.7	25.5	28.4	27.9	25.6	26.3	25.7	25.6		26.8	28.1	24.9		24.6	28.1	24.9
		26.8				24.6	28.5	28.3
							27.8	20.2
							25.2	27.6
							26.8	25

## Sheet: Figure 7-figure supplement 2b
	Body Weight (g)
		WT
		ND+saline							HFD+saline								ND+Ang II 0.7γ							HFD+Ang II 0.7γ
	0W	21.5	23.1	23.3	24.2	24.3	24.4	25.9	22.6	22.8	24	24.1	24.4	24.4	24.5	24.8	23.6	25.2	26.5	24.9	24	24.1	23.8	25.5	25	23.6	24.2	24.3	23.8	24.1
	1W	24.7	25.5	27.4	26.1	26.7	25.3	26.9	22.4	23.5	23.5	26	25.5	26.1	24.3	24.1	25.6	27.6	29.6	27.8	25.9	28.2	24.4	26.5	26.3	23.1	25	25.1	24.7	24.8
	2W	24.2	26.2	28.5	26.4	28.2	26.1	28.5	23	24.4	24.6	25.5	26.3	26.1	24.1	24.3	25.9	27.9	29.9	28.3	26.1	28.5	24.5	27.1	26.7	20.9	24.9	23.6	24.2	24.7
	3W	26.8	27.4	30.2	27.6	30.9	27.4	31.9	24.2	26.1	27.5	26.8	28.1	28.7	26.9	25.9	26.4	30.5	31.8	29.5	26.6	29.5	26.1	26.1	28.1	19.9	25.9	25.2	25.5	26.5
	4W	27.1	28.1	30.2	28	31.3	28.4	32.6	26.3	26.9	29.3	27.2	28.6	29.4	26.3	27.2	27.5	30.8	32.6	30.2	28.3	29.2	27.2	27.9	28.9	20.3	26.8	24.9	26.6	26.5
	5W	26.7	27.3	30.9	28.8	30.9	28.4	33.1	26.4	26	29.3	27.7	29.2	29.9	26.1	27.5	27.9	30.6	32.5	30.6	28.7	30.2	27.7	28.5	29.8	18.3	26.5	26.4	27.8	27.5
	6W	26.9	26.9	28.5	28.7	30.5	28.9	33.7	26.5	26.1	29.1	27.5	29.2	29.7	25.5	26.8	28.8	31.9	32.9	27.7	29.7	30.1	28.4	27.7	30.1	21.7	25.7	25.4	28.2	27.9
	Body Weight (g)
		LOX-1 KO
		ND+saline							HFD+saline								ND+Ang II 0.7γ											HFD+Ang ll 0.7γ
	0W	23.6	25	24.2	24	23.6	21.3	23	22.1	24.3	22.4	22	22.1	24.8	23.2	23	21.5	25	24	21.5	25.1	24	21	24.5	23.4	21.4	22.2	23.4	21.4	23.9	22.5	22.4	22.9	22.5	24.7	26.3	25.9	24
	1W	23.1	25.4	25.7	24.3	23.3	20.8	22.3	22.3	24.8	20.9	22.9	22.7	24.9	22.9	23.1	22.7	25.6	24	22	25.2	24.4	21.3	24.8	23.7	22.2	22.7	21	22.3	22.4	22.6	22	21.6	21.6	24.2	20.8	25.7	23.1
	2W	22.4	25	24.9	23.6	23.6	20.9	22.7	21.8	24.7	17.7	22	22.5	24.3	22.1	22.2	22.5	26.3	24.5	22.1	25.5	25.1	21.3	26.2	25.1	22.3	23.3	25.1	22.3	21.5	22	21.4	22.1	21.8	24.8	18.1	25.8	22.9
	3W	24.1	27.4	28.1	26.1	25.5	23.4	24.7	23.5	26	18.1	23.7	23.4	26.5	24.5	23.7	24.4	27.7	25.8	22.1	26.8	26.9	23.7	26.9	26.1	23.8	25.2	26.1	23.9	23.4	23.1	24.1	23.5	23.7	25.7	20	26.7	24.2
	4W	24.9	28.2	28.7	26.7	25.7	23.5	25.4	22.4	25.4	16.5	24.1	24.1	26.9	24.8	23.5	25.2	28.1	26.5	23.1	26.2	27	23.4	28	26.8	24.2	26	24	24.2	23	23.4	24.5	24.7	23.3	26.5	17.8	27.2	23.8
	5W	24.6	28.7	28.6	26.3	25.9	23.1	25.4	24.9	26.5	17.4	24.8	24.7	26.5	25.8	24.4	26.4	27.8	26.4	23.7	26.9	27.1	24.9	29.1	27.2	24.4	26.5	27.2	24.4	24.3	24	25.1	24.5	24.8	26.7	19.8	27.3	24.2
	6W	25.2	30.2	29.4	27.1	26.7	23.3	25.6	24.7	26.5	19	24.7	24.6	26.7	26.3	24.6	26.6	28.6	25.9	23.1	27	28.5	25.7	28.5	27.8	25.2	26.8	25	25.3	25.8	25	25.4	25.7	24.9	28.3	20.2	27.6	25

## Sheet: Figure 7-figure supplement 2c
	Body Weight (g)
		WT
		ND+saline							HFD+saline								ND+Angll 0.1γ								HFD+Angll 0.1γ
	0W	21.5	23.1	23.3	24.2	24.3	24.4	25.9	22.6	22.8	24	24.1	24.4	24.4	24.5	24.8	22.5	23	22.1	23	21.5	21.9	23.4	22	23.5	23.9	23	23	22.5	22.3	22	22
	1W	24.7	25.5	27.4	26.1	26.7	25.3	26.9	22.4	23.5	23.5	26	25.5	26.1	24.3	24.1	23	23.5	24.5	25.5	23	23	23.8	22.6	23.1	23.3	23	22.3	22	21.6	21.5	21.5
	2W	24.2	26.2	28.5	26.4	28.2	26.1	28.5	23	24.4	24.6	25.5	26.3	26.1	24.1	24.3	23.1	21.9	24.8	24.8	22.4	23.6	24	21.9	22	23.6	22	21.5	21.9	21.3	22	21
	3W	26.8	27.4	30.2	27.6	30.9	27.4	31.9	24.2	26.1	27.5	26.8	28.1	28.7	26.9	25.9	24.8	24.6	24.1	27.7	24.6	25.8	27.5	24.7	25.2	26.3	24.6	23.4	23.1	24.1	23.4	23.6
	4W	27.1	28.1	30.2	28	31.3	28.4	32.6	26.3	26.9	29.3	27.2	28.6	29.4	26.3	27.2	25.9	25.2	25	29.7	25.2	25.8	27.1	25.6	26.2	26.7	25.8	24.2	23.3	24.4	24.6	23.2
	5W	26.7	27.3	30.9	28.8	30.9	28.4	33.1	26.4	26	29.3	27.7	29.2	29.9	26.1	27.5	26.2	26.4	25.8	28.1	24.9	25.1	27.9	26.8	27.3	26.9	26.1	24.3	24.5	25.1	24.5	24
	6W	26.9	26.9	28.5	28.7	30.5	28.9	33.7	26.5	26.1	29.1	27.5	29.2	29.7	25.5	26.8	26.7	26.3	26.2	28.9	24.8	26.2	28.6	28.1	27.9	27.8	27.1	25.8	24.6	25.3	25.7	24.9
	Body Weight (g)
		LOX-1 KO
		ND+saline							HFD+saline								ND+Angll 0.1γ								HFD+Angll 0.1γ
	0W	23.6	25	24.2	24	23.6	21.3	23	22.1	24.3	22.4	22	22.1	24.8	23.2	23	22.5	23	22.1	23	21.5	21.9	23.4	22	23.5	23.9	23	23	22.5	22.3	22	22
	1W	23.1	25.4	25.7	24.3	23.3	20.8	22.3	22.3	24.8	20.9	22.9	22.7	24.9	22.9	23.1	23	23.5	24.5	25.5	23	23	23.8	22.6	23.1	23.3	23	22.3	22	21.6	21.5	21.5
	2W	22.4	25	24.9	23.6	23.6	20.9	22.7	21.8	24.7	17.7	22	22.5	24.3	22.1	22.2	23.1	21.9	24.8	24.8	22.4	23.6	24	21.9	22	23.6	22	21.5	21.9	21.3	22	21
	3W	24.1	27.4	28.1	26.1	25.5	23.4	24.7	23.5	26	18.1	23.7	23.4	26.5	24.5	23.7	24.8	24.6	24.1	27.7	24.6	25.8	27.5	24.7	25.2	26.3	24.6	23.4	23.1	24.1	23.4	23.6
	4W	24.9	28.2	28.7	26.7	25.7	23.5	25.4	22.4	25.4	16.5	24.1	24.1	26.9	24.8	23.5	25.9	25.2	25	29.7	25.2	25.8	27.1	25.6	26.2	26.7	25.8	24.2	23.3	24.4	24.6	23.2
	5W	24.6	28.7	28.6	26.3	25.9	23.1	25.4	24.9	26.5	17.4	24.8	24.7	26.5	25.8	24.4	26.2	26.4	25.8	28.1	24.9	25.1	27.9	26.8	27.3	26.9	26.1	24.3	24.5	25.1	24.5	24
	6W	25.2	30.2	29.4	27.1	26.7	23.3	25.6	24.7	26.5	19	24.7	24.6	26.7	26.3	24.6	26.7	26.3	26.2	28.9	24.8	26.2	28.6	28.1	27.9	27.8	27.1	25.8	24.6	25.3	25.7	24.9

## Sheet: Figure 7-figure supplement 2d
	Average food intake (g/week/mouse)
		WT
		ND+saline			HFD+saline				ND+Ang ll 0.7γ				HFD＋Ang ll 0.7γ
	0W
	0.5W	24.5667	26.1	26.4	16.5	22.5667	20.7	25.8	23.8	27.95	22.75	25.7	18.8333		19.9667	19.35
	1W
	1.5W	24.1	23.9	27.65	16.9667	23.6333	18.6	20.5	22.1333	27.85	20.5	28.6	14.7		21.1	19.5
	2W
	2.5W	24.1	25.2667	17.3	18.4	24.0333	22.9	19.7	22.1	25	19	26.3	12.5	19	16.5333	17.55
	3W
	3.5W	25.4333	24.9333	16.75	18.6	24.3	19.9	21.8	25.7	26.45	22.25	27.9	11.5	19.3	24.3667	20.5
	4W
	4.5W	25.4667	25.8333	17.55	19.5667	25.7667	21	23.3	29.85	27.1	21.9	26.2	12.85	20.9	19.9	18
	5W
	5.5W	22.7	22.9	14.1	16.3333	18.7333	18.3	18.9	25.15	26.45	22.45	27.2	10.6	18.6	19.9667	20.15
	6W
	Average food intake (g/week/mouse)
		LOX-1 KO
		ND+saline		HFD+saline		ND+Ang ll 0.7γ						HFD+Ang ll 0.7γ
	0W
	0.5W	21.275	19.675	13.3	14.325	17.9	19.9	17.5333	16.85	19.9	18.92	12.55	15.05	13.22	15.7333	13.22
	1W
	1.5W	20.825	19.225	12.65	15.275	18.25	20.25	21.0333	20.7	18.8	18.28	11.775	15.875	14.86	18.9	14.86
	2W
	2.5W	20.7	19.425	12.05	15.075	19	17.8	20.7333	19.5	16.9	16.04	14.1667	14.8	12.66	13.6333	12.66
	3W
	3.5W	22.8	19.425	14.325	16.7	15.8667	20	21.9333	17.95	23.9	21	12.8333	11.2	11.08	14.9333	11.08
	4W
	4.5W	24.45	22.45	18.075	17.9	15.9	19.95	25.6667	23.425	18.1	18.18	17.15	14.9	10.46	14.8	10.46
	5W
	5.5W	18.75	16.4	11.625	13.325	15.3333	18.85	21.2	16.5	23.2	18.58	16.65	13.175	9.76	13.5667	9.76
	6W

## Sheet: Figure 7-figure supplement 2e
	Average food intake (g/week/mouse)
		WT
		ND+saline			HFD+saline				ND+Ang ll 0.1γ			HFD+Ang ll 0.1γ
	0W
	0.5W	24.5667	26.1	26.4	16.5	22.5667	20.7	25.8	22.6333	23.3667	20.75	19.0333	18.9	18.9667
	1W
	1.5W	24.1	23.9	27.65	16.9667	23.6333	18.6	20.5	18.6333	18.3667	19.4	17.4667	15.6333	17.5
	2W
	2.5W	24.1	25.2667	17.3	18.4	24.0333	22.9	19.7	19.0333	19.3	20.25	18.1667	16.8	15.1333
	3W
	3.5W	25.4333	24.9333	16.75	18.6	24.3	19.9	21.8	23.3667	22.0667	22.6	22.0667	17.7	15.9333
	4W
	4.5W	25.4667	25.8333	17.55	19.5667	25.7667	21	23.3	22.5333	23.1333	26.05	22.3	20.9333	15.2
	5W
	5.5W	22.7	22.9	14.1	16.3333	18.7333	18.3	18.9	23.7333	24.0333	26.85	27.2667	21.1	19.4667
	6W
	Average food intake (g/week/mouse)
		LOX-1 KO
		ND+saline		HFD+saline		ND+Ang ll 0.1γ		HFD+Ang ll 0.1γ
	0W
	0.5W	21.275	19.675	13.3	14.325		18.58	13.2	17.275
	1W
	1.5W	20.825	19.225	12.65	15.275		17.76	13.625	14.15
	2W
	2.5W	20.7	19.425	12.05	15.075	16.9	16.82	10.225	18.95
	3W
	3.5W	22.8	19.425	14.325	16.7	23.9	20.12	11.2	16.8
	4W
	4.5W	24.45	22.45	18.075	17.9	18.1	16.26	11.1	12.225
	5W
	5.5W	18.75	16.4	11.625	13.325	23.2	18.32	10.175	11.675
	6W

## Sheet: Figure 7-figure supplement 2f
	SBP(mmHg)
		WT
		ND+saline							HFD+saline								ND+Ang ll 0.7γ							HFD+Ang ll 0.7γ
	0W	96	101	109	105.5	116.7	111.8	125.2	119.3	106.8	114.2	91.7	96.8	123.3	108.8	100.2	93.7	98	111.3	110.3	107	113.7	108.3	117.7	97.5	88.2	108.7	113	106.7	90.3
	0.5W	110.8	101.8	105.7	109.8	113.5	99.7	114.3	101.2	103.8	105.8	98.8	110.3	114.8	104.3	110.3	101.75	105.25	109.25	110.5	100.75	112.25	94.75	101	101	93	98.25	94.25	109.25	107.25
	1W	104.5	108	114.7	104.8	114	110	116.5	122.8	106.8	119.2	113.7	103.8	114.8	127.5	102.8	105.75	103.25	113	110	107.25	108.75	110	110.25	107.5	102.25	106.25	99	92.5	103.25
	1.5W	109.3	105.7	113.3	107.2	112.5	101.3	114.3	118.8	106.2	109.2	102.3	113.8	108.3	106.8	106.8	97.75	110.75	112.75	107	100.75	100	107.25	102	90.5	91.5	106.75	104.75	92.75	106
	2W	123.2	111.8	123.3	115.3	117.3	101.7	118.7	125	122.2	110.5	94.7	107.8	102.3	115.8	116	107.5	106.75	112.25	107.5	101.5	108.5	103.25	112.5	105.25	115.25	106.75	107.5	107.25	112.25
	2.5W	110	104	118.7	116.2	102.5	109.3	106.5	102	103.5	107	93	90.7	109.7	100	105.7	110.25	137.5	138.25	141.5	129.75	142.75	124.75	137.25	105.5	132.75	153.5	141.5	134	149
	3W	112.3	120.8	104.8	111.7	116.7	117.5	119.8	104.8	111.5	107.2	106.2	94.5	102.7	109.8	111.8	121.25	129.5	146	115.25	125.75	139.25	121	143	123.25	137	124	150.25	121	121.5
	3.5W	117.3	109.7	106.8	112.7	114	106.5	114.3	106.8	90.2	101.7	102	98.5	98.8	98	102.8	126.25	139	146	153.25	113.5	132	122.75	149	121.5	141	150	139.25	123.25	119
	4W	120.2	112.8	114.3	104.2	113.2	110	118.2	116.3	119.2	108	107.8	106	98	117.7	120.7	119	152.5	153.25	142	125.25	143.25	132	139	129	137	139.75	128	135.75	142
	4.5W	102.3	94.3	103.3	101.8	113.3	96	117.3	95.8	101.5	98.2	106.2	99	98.2	107.7	108.2	138	143	131.75	127.5	145.25	139.5	143	122.333	129.75	153	164.25	117.5	121	126
	5W	105.2	108.8	129.8	106.8	117.7	113.7	127.7	111.3	111.2	104.5	114.2	110.2	103	105.7	113.3	135	149	147.25	125.75	157.5	125.75	146.5	148	139.25	155	158.5	113.25	125.75	145.5
	5.5W	112.5	95.8	91.8	111.8	105.5	110.5	117.3	92.2	103.2	106.5	116.8	99.8	115.8	106.3	86.3	125.5	165.5	148.75	159.5	154	136.5	134.75	135.25	133.5	132.25	150.25	123	132.25	138.25
	6W	120	126.8	116.3	118.7	133.5	119.7	131.7	118.8	110.5	128.8	112	113.3	119.8	105	124.3	158.75	161.75	131	156	129	143	166.75	145.5	153	156	143	122.5	154.5	158.25
	SBP(mmHg)
		LOX-1 KO
		ND+saline							HFD+saline							ND+Ang ll 0.7γ																	HFD+Ang ll 0.7γ
	0W	95.8	106.2	79.5	99.7	102.7	99.5	106.5	95.8	104.3	96.3	101.3	105.7	102.2	99.5	106.7	109.3	107.2	92.8	91.5	104.7	87.3	102.3	99.7	88.5	86	90.8	108.8	98.7	103.3	105.2	90.2	95.2	101.2	112.3	95.5	106.5	95.3	96.5	92.3	92.2	97.2	111.2	93.5	99	96.2	97.7	97.7	96.5
	0.5W	94	97.7	101.2	101.7	98	90.7	95.3	101.7	105.2	96	101	119.5	97.3	98.3	103.7	106.8	104.2	92.2	97.7	100.3	90.8	103.2	97	93.7	84.3	93.7	107.2	98.5	98.3	103	88.2	106.7	100.2	125.5	114.8	111.2	99.5	97.2	98.7	103.7	107.8	104.2	101.8	107	109.8	108.5	97.5	106.3
	1W	114.2	106.8	87.8	106.2	102	99.5	103.3	114.2	117.8	93.2	106.8	121.7	112.5	105.2	113.3	99.3	101.7	104	104.3	113	98	97.3	104.7	99.7	98.5	90.5	109.2	84.7	95.2	89.5	89	105.8	100.2	115.8	96.3	102.7	103.3	104.5	102.7	105.2	108.8	108.8	107.5	116.2	107	101.8	89.8	109.3
	1.5W	108.2	100	95.3	113.8	96.7	110	94.2	117.2	112.8	98.8	111.8	113.8	114.2	109.8	112.8	110	107.3	106.2	97	103.3	99.5	104.7	96.5	95	99.5	98.2	107.2	96.5	89.3	105.3	89.5	114.2	113	79.2	88	107.7	101.8	95.7	106.2	103.3	101.3	106.3	104.5	108.2	104.8	108.7	104.8	112.7
	2W	98.7	109.7	103.7	109.8	101	108.5	102	108.5	116.2	99.7	111	108.2	116.3	106.5	105.2	107.8	99.2	101.7	111.3	110.3	92.8	106.7	103	100.7	102.3	98	112.2	94.7	100.7	111	94.3	106.8	109.8	115.5	87.5	109.2	110	101.8	112	109.5	100	101.3	106.3	112	102	107.2	97.2	105
	2.5W	110.5	102.5	104.8	104.3	103.2	105.8	107.5	103	104	104	107.3	111.3	100.8	93.7	154.7	117.2	149.7	138.7	145	121.5	137.7	133.2	164	134.2	134	134.5	163.3	130.3	94.8	98.7	87.2	128.8	154.3	111	164.3	118.5	127.3	95.3	117.7	139.3	115	145.8	96.3	106.3	92.2	141.7	141.3	101.2
	3W	106.5	103.8	103.8	108.2	100.2	101.5	99.2	105.8	104.2	101.2	108.3	103.7	103.2	97.2	137.7	137.3	140.7	134.2	93	150	151	137.2	96.8	143.2	80.3	103.8	104	98.2	142.8	99.5	113	137.3	132.8	104.7	114.2	126.5	94.5	128.8	126	116.3	110.7	127.7	136.2	134.8	109.3	141.8	143.5	143.2
	3.5W	101.5	105.2	105.2	101.8	105.7	104.5	101.3	100.3	98.3	104.5	108.7	104.3	105.3	106.5	141.7	144.5	144.3	145.8	110.8	130.8	104.3	101.5	145.5	148	98.2	89.8	135	104.2	97	114.2	89.2	148.8	150.8	104	139.7	113.3	115.3	97.5	90.5	138.8	112.3	109.3	137	114.2	99.2	105.2	129.2	127.7
	4W	94.2	107.5	107.5	98.8	102.3	100.7	109.2	100.8	106.2	104.8	85.3	96.3	85.3	96.5	102	111.2	111.5	155.5	104.2	99.3	146.8	128	134.2	144.8	115.8	91.3	143.2	92	157.8	95.8	108	113.8	103.2	104.2	120.5	102.7	91.5	93.5	92.2	86.8	92.8	109.2	90.2	105.5	114	106.8	130	126.7
	4.5W	94.5	100.7	100.7	105.7	91.5	101.8	108.2	100.3	111.2		101.2	109.3	90.8	93.2	124	132.8	159.3	161.5	103.8	103.8	132.2	100.8	136.3	129.2	117.5	95.8	158.3	94.2	145.7	109.3	102	115	151	113	123	114.7	140.2	102	95.7	111	93.5	101.8	95.8	144.8	87.5	106.5	130.7	133
	5W	85.7	92.7	92.7	93.7	100.3	105.5	108.5	102.5	103.2	97.7	90.5	101.7	92.7	94.5	108.5	100	160.5	157	110.8	130.8	104.3	100.2	145.5	148	98.2	140	158.3	123.2	148.5	100.5	101.8	118.2	109.7	104	139.7	113.3	115.3	97.5	90.5	138.8	112.7	104	96.8	140.3	101.8	111.3	159.5	129.8
	5.5W	110.3	102.8	102.8	103.8	94.5	104.7	97	100.3	98.3	100.8	102.5	113.3	90.2	102.7	157.2	171.3	147.5	153.8	113.3	128.5	129.3	121	136.2	120.7	116	126.8	156.7	107.7	156.2	94.7	106.2	158.5	151.8	103.8	138.7	101.8	101.5	101	98.8	145	104.5	97.2	100.2	111.3	103.5	103	137.5	136.5
	6W	107	108.8	108.8	105.7	98	90.3	94.2	102.5	103	97.2	105	109.5	102.7	95.2	111.3	158	166.7	157.2	106.7	121.3	147.2	103.2	128.5	121.8	95.7	140.5	172.2	105.8	149.5	103.2	97.7	105.8	160	104.7	88.7	115	99.2	100.3	98.3	137.7	99.3	107.8	108.8	156.2	101.2	120.2	145	134.3

## Sheet: Figure 7-figure supplement 2g
	SBP(mmHg)
		WT
		ND+saline							HFD+saline								ND+Ang ll 0.1γ								HFD+Ang ll 0.1γ
	0W	96	101	109	105.5	116.7	111.8	125.2	119.3	106.8	114.2	91.7	96.8	123.3	108.8	100.2	117.7	91.3	92.3	92	102.7	93.6	87.3	99.7	103.6	102.3	107	110.7	96.3	101.6	97	97
	0.5W	110.8	101.8	105.7	109.8	113.5	99.7	114.3	101.2	103.8	105.8	98.8	110.3	114.8	104.3	110.3	121	92.6	99.3	102.3	108.3	97	103.7	106.6	111.3	105	106.6	117.6	98	113	106.7	105
	1W	104.5	108	114.7	104.8	114	110	116.5	122.8	106.8	119.2	113.7	103.8	114.8	127.5	102.8	118.6	107.3	104.6	113.3	110.3	111	104	107	102	108.3	101.3	109	98.7	109	98	93.7
	1.5W	109.3	105.7	113.3	107.2	112.5	101.3	114.3	118.8	106.2	109.2	102.3	113.8	108.3	106.8	106.8	114.6	95.3	107	101.3	108.3	102.3	101.3	97	121.7	104.6	120.7	115.6	88.6	114.3	111.7	103.3
	2W	123.2	111.8	123.3	115.3	117.3	101.7	118.7	125	122.2	110.5	94.7	107.8	102.3	115.8	116	136	97	114.6	112.3	117.7	114	94.3	100.3	114.6	102	108.3	122	109	99	104	101
	2.5W	110	104	118.7	116.2	102.5	109.3	106.5	102	103.5	107	93	90.7	109.7	100	105.7	116.3	103.3	102.6	122	108	104.3	107.3	97	107	114	100	118.7	96.6	96.3	101	97
	3W	112.3	120.8	104.8	111.7	116.7	117.5	119.8	104.8	111.5	107.2	106.2	94.5	102.7	109.8	111.8	122.3	101.3	111	114.3	123.6	116	118.3	101.7	120	113.6	104.6	112.3	106.3	104.6	104.6	92.7
	3.5W	117.3	109.7	106.8	112.7	114	106.5	114.3	106.8	90.2	101.7	102	98.5	98.8	98	102.8	108.6	103	112	103.6	115.3	103.6	105.3	107	106.3	138	101	111.3	104.6	104.6	101.6	102
	4W	120.2	112.8	114.3	104.2	113.2	110	118.2	116.3	119.2	108	107.8	106	98	117.7	120.7	130	105	117	113.6	106	109.3	106.6	107	103	114.6	105.7	115.3	110	105	102	95
	4.5W	102.3	94.3	103.3	101.8	113.3	96	117.3	95.8	101.5	98.2	106.2	99	98.2	107.7	108.2	115.3	111.6	108.3	107	101	112	110.6	101.3	109.6	105	107	115.6	106	109.3	104	105
	5W	105.2	108.8	129.8	106.8	117.7	113.7	127.7	111.3	111.2	104.5	114.2	110.2	103	105.7	113.3	126	112.3	110.3	110	111	106.3	99.6	100	105.3	112.3	106.3	112.6	98.3	105	104.6	101
	5.5W	112.5	95.8	91.8	111.8	105.5	110.5	117.3	92.2	103.2	106.5	116.8	99.8	115.8	106.3	86.3	112.6	105	106.3	103	98.3	104	116.6	128.7	104	98.3	103.3	114	102.7	100	105	104.7
	6W	120	126.8	116.3	118.7	133.5	119.7	131.7	118.8	110.5	128.8	112	113.3	119.8	105	124.3	126	109	118	116.6	104	109.7	112.3	110	97.6	108.3	107.7	115	114.3	89.3	98.3	118
	SBP(mmHg)
		LOX-1 KO
		ND+saline							HFD+saline							ND+Ang ll 0.1γ							HFD++Ang ll 0.1γ
	0W	95.8	106.2	79.5	99.7	102.7	99.5	106.5	95.8	104.3	96.3	101.3	105.7	102.2	99.5	95.7	96.3	101.5	96.2	97.8	104.5	96.8333	97.5	104.667	83.3333	102	96	94.8333	98.6667
	0.5W	94	97.7	101.2	101.7	98	90.7	95.3	101.7	105.2	96	101	119.5	97.3	98.3	96.8	105.5	104.2	99.8	96.2	103.5	107.167	92.3333	99.6667	106.5	106	101	95.6667	106
	1W	114.2	106.8	87.8	106.2	102	99.5	103.3	114.2	117.8	93.2	106.8	121.7	112.5	105.2	91.8	97	105.5	108.5	91	101.167	112.167	106.167	101	93.3333	103.667	102.833	92.5	102.833
	1.5W	108.2	100	95.3	113.8	96.7	110	94.2	117.2	112.8	98.8	111.8	113.8	114.2	109.8	92.7	106	110.2	93.2	92.2	116.833	115.333	89.8333	100.5	95.1667	105.833	102.333	100.667	107.833
	2W	98.7	109.7	103.7	109.8	101	108.5	102	108.5	116.2	99.7	111	108.2	116.3	106.5	107.3	101.2	99.5	101.8	97.8	97.3333	103.5	101.167	98.8333	90.5	106.667	100.667	99	103.833
	2.5W	110.5	102.5	104.8	104.3	103.2	105.8	107.5	103	104	104	107.3	111.3	100.8	93.7	101.667	101.167	111	99.5	98.3333	105.833	108.333	101.167	101.333	100.833	104	90.6667	105.833	107.167
	3W	106.5	103.8	103.8	108.2	100.2	101.5	99.2	105.8	104.2	101.2	108.3	103.7	103.2	97.2	113.333	95	108.333	114.167	104.5	96.8333	110	89	98.5	100.833	114.667	109	115	108.5
	3.5W	101.5	105.2	105.2	101.8	105.7	104.5	101.3	100.3	98.3	104.5	108.7	104.3	105.3	106.5	119.333	104.667	107.833	99.6667	104.333	103.167	107.167	100.5	101.5	97.1667	97.3333	100	95.6667	89.5
	4W	94.2	107.5	107.5	98.8	102.3	100.7	109.2	100.8	106.2	104.8	85.3	96.3	85.3	96.5	92.5	96.8333	102.333	103.833	97.6667	99	107.5	86.8333	95.1667	102.5	94	97.1667	100.167	103
	4.5W	94.5	100.7	100.7	105.7	91.5	101.8	108.2	100.3	111.2		101.2	109.3	90.8	93.2	94.1667	98.8333	110.333	96.1667	99	102.5	110.167	100	94.8333	104.667	106.5	104.333	99.6667	106.833
	5W	85.7	92.7	92.7	93.7	100.3	105.5	108.5	102.5	103.2	97.7	90.5	101.7	92.7	94.5	110	97.1667	107.5	98.1667	95.3333	103.833	107.167	98.1667	94.6667	105.667	101.667	100.333	98.8333	99.5
	5.5W	110.3	102.8	102.8	103.8	94.5	104.7	97	100.3	98.3	100.8	102.5	113.3	90.2	102.7	118.833	108.167	119	109.833	99.6667	102	104	88.3333	94.3333	103.167	93	106	83	103
	6W	107	108.8	108.8	105.7	98	90.3	94.2	102.5	103	97.2	105	109.5	102.7	95.2	106.333	102.333	101.5	136.667	95.8333	99	123.5	92.5	104.667	102.167	97.1667	102.167	91.6667	102.333
