# Supplementary material for: Oxidized low-density lipoprotein potentiates angiotensin II-induced Gq activation through the AT1-LOX1 receptor complex
Source: eLife. 2025 Mar 25;13:RP98766. doi: 10.7554/eLife.98766 (PMC11936421; doi:10.7554/eLife.98766)
Supplement: Figure 7—figure supplement 3—source data 1. — Source data for Figure 7—figure supplement 3. [file elife-98766-fig7-figsupp3-data1.xlsx]

## Sheet: Figure 7-figure supplement 3
	Plasma aldosterone concentration (pg/mL)
	ND+Ang II	HFD+Ang II
	87.3666	123.69
	76.7643	117.265
	68.4707	121.881
	106.54	224.667
	88.0519	141.151
	131.074	95.3067
	161.288	168.864
