# Supplementary material for: Oxidized low-density lipoprotein potentiates angiotensin II-induced Gq activation through the AT1-LOX1 receptor complex
Source: eLife. 2025 Mar 25;13:RP98766. doi: 10.7554/eLife.98766 (PMC11936421; doi:10.7554/eLife.98766)
Supplement: Figure 7—source data 1. — Source data for Figure 7b–d. [file elife-98766-fig7-data1.xlsx]

## Sheet: Figure 7b
	Average SBP during Ang ll infusion (mmHg)									Average SBP during Ang ll infusion (mmHg)
	Ang ll0.7γ									Ang ll 0.1γ
	WT				LOX-1 KO					WT				LOX-1 KO
	ND+saline	HFD+saline	ND+Ang ll	HFD+Ang ll	ND+saline	HFD+saline	ND+Ang ll	HFD+Ang ll		ND+saline	HFD+saline	ND+Ang ll	HFD+Ang ll	ND+saline	HFD+saline	ND+Ang ll	HFD+Ang ll
	113.667	108.111	126.833	136.87	100.989	102.667	126.922	125.889		113.667	108.111	121.456	107.489	100.989	102.667	107.052	95.2963
	109.422	108.111	142.722	126.667	103.744	104.956	131.122	135.933		109.422	108.111	105.278	111.789	103.744	104.956	100.596	98.2037
	112.122	108.044	139.389	139.917	103.333	101.237	142.156	107.211		112.122	108.044	111.122	104.878	103.333	101.237	107.481	100.833
	111.022	105.878	136.472	143.333	103.533	102.2	145.044	124.033		111.022	105.878	111.378	115.2	103.533	102.2	106.644	101.667
	114.856	102.2	131.278	126.972	99.6333	106.4	110.989	112.778		114.856	102.2	109.433	105.311	99.6333	106.4	99.163	101.148
	109.433	105.367	134.5	128.306	102.589	98.5889	121.811	110.533		109.433	105.367	108.8	101.456	102.589	98.5889	101.056	98.7593
	119.056	107.333	132.75	134.639	103.011	98.4444	127.289	101.967		119.056	107.333	107.878	102.789	103.011	98.4444	109.037	102.63
		109.9					114.644	102.411			109.9	105.889	101.822
							132.222	124.8
							132.289	104.533
							106.444	111.567
							113.389	107.511
							144.8	125.044
							105.589	101.189
							132.556	115.967
							102.989	134.878
							99.9333	126.378

## Sheet: Figure 7c
	Urine 8-ohdg concentration (mg/gCr)									Urine 8-ohdg concentration (mg/gCr)
	Ang ll 0.7γ									Ang ll 0.1γ
	WT				LOX-1 KO					WT				LOX-1 KO
	ND+saline	HFD+saline	ND+Ang ll	HFD+Ang ll	ND+saline	HFD+saline	ND+Ang ll	HFD+Ang ll		ND+saline	HFD+saline	ND+Ang ll	HFD+Ang ll	ND+saline	HFD+saline	ND+Ang ll	HFD+Ang ll
	0.676371	0.69696	2.75665	7.49354	0.092907	0.062667	1.00166	0.874506		0.676371	0.69696	1.51305	1.16721	0.154162	0.063341	4.81816	3.83022
	0.63738	0.625995	2.00684	6.43977	0.172862	0.198716	0.911362	0.408097		0.63738	0.625995	2.92418	1.12305	0.092907	0.062667	2.47794	1.92669
	0.383189	0.831625	1.77448	4.43479	0.102631	0.065336	0.755404	0.435723		0.383189	0.831625	1.81099	1.31106	0.172862	0.198716	1.73312	2.21972
	0.789651	0.409411	3.79739	3.60338	0.123705	0.078074	1.00178	0.302111		0.789651	0.409411	0.790504	1.17857	0.102631	0.065336	1.85168	0.67759
	0.751128	0.838766	1.37032	4.88835	0.142369	0.082314	1.01567	0.403561		0.751128	0.838766	1.68264	5.39768	0.123705	0.078074	1.34957	0.695382
	0.852712	0.699205	2.24001	6.08972	0.200321	0.069786	0.849816	0.133085		0.852712	0.699205		1.5077	0.142369	0.082314	1.12749	0.759976
	0.70711	0.92779	1.69926	3.1744	0.118167	0.07913	0.403561	2.50826		0.70711	0.92779			0.200321	0.069786		0.789925
		0.986925					1.74436	2.46388			0.986925			0.118167	0.07913
							1.48219	0.822142
							2.71945	2.19989
							1.47267	1.31478
							2.2888	1.07733
							3.28049

## Sheet: Figure 7d
	Urine albumin (mg/gCr)									Urine albumin (mg/gCr)
	Ang ll 0.7γ									Ang ll 0.1γ
	WT				LOX-1 KO					WT				LOX-1 KO
	ND+saline	HFD+saline	ND+Ang ll	HFD+Ang ll	ND+saline	HFD+saline	ND+Ang ll	HFD+Ang ll		ND+saline	HFD+saline	ND+Ang ll	HFD+Ang ll	ND+saline	HFD+saline	ND+Ang ll	HFD+Ang ll
	34.7572	19.3702	80.2691	275.358	12.7283	4.64788	50.0575	82.4834		34.7572	19.3702	59.7051	119.36	12.7283	4.64788	54.2692	63.2257
	43.1507	14.91	108.117	233.553	8.47195	5.25532	335.841	151.942		43.1507	14.91	67.0457	156.481	8.47195	5.25532	41.1751	51.7385
	16.4185	17.9572	146.108	220.587	16.2955	17.8662	427.532	229.185		16.4185	17.9572	69.6715	127.325	16.2955	17.8662	47.1434	47.1285
	17.3263	17.2365	113.395	383.073	6.52688	4.95665	44.8916	173.087		17.3263	17.2365	100.392	94.3898	6.52688	4.95665	44.1344	38.8197
	18.3329	24.8521	350.353	250.941	14.5442	3.97537	236.564	49.2913		18.3329	24.8521	85.0369	123.457	14.5442	3.97537	60.3549	94.2283
	16.0417	13.0916	201.46	220.162	12.5679	6.99202	87.0556	48.4291		16.0417	13.0916	131.05	98.1011	12.5679	6.99202	106.156	49.2854
	16.4654	28.4631	72.5348	227.419	12.3831	8.5245	664.029	73.463		16.4654	28.4631			12.3831	8.5245	59.0908	63.2777
		14.8859			10.2018	7.10534	27.0217	89.3197			14.8859			10.2018	7.10534
							49.2699	88.4741
							27.8943	101.134
							24.3213	84.4619
							37.8986	302.658
							56.6612	68.4684
							46.5138	136.137
							41.3344
							13.4083
							19.5172
							28.0739
							20.1821
