# Supplementary material for: Oxidized low-density lipoprotein potentiates angiotensin II-induced Gq activation through the AT1-LOX1 receptor complex
Source: eLife. 2025 Mar 25;13:RP98766. doi: 10.7554/eLife.98766 (PMC11936421; doi:10.7554/eLife.98766)
Supplement: Figure 8—figure supplement 1—source data 1. — Source data for Figure 8—figure supplement 1a and b. [file elife-98766-fig8-figsupp1-data1.xlsx]

## Sheet: Figure 8-figure supplement 1a
	Relative gene expression normalized to GAPDH
	COX-2									E-cadherin
	WT				LOX-1 KO					WT				LOX-1 KO
	ND+saline	HFD+saline	ND+Ang ll	HFD+Ang ll	ND+saline	HFD+saline	ND+Ang ll	HFD+Ang ll		ND+saline	HFD+saline	ND+Ang ll	HFD+Ang ll	ND+saline	HFD+saline	ND+Ang ll	HFD+Ang ll
	111.602	128.71	93.2134	272.301	152.948	221.755	132.145	122.782		104.908	109.24	79.5336	104.337	59.5457	42.9118	66.2874	38.4532
	101.183	117.7	89.6783	132.081	115.278	261.561	71.0092	74.5973		110.51	97.909	95.6378	50.4755	81.335	62.2707	75.3781	59.4389
	104.925	160.359	173.942	241.911	248.957	109.273	205.334	190.148		86.793	118.341	92.9926	49.5463	50.0729	59.8293	80.4609	66.6535
	152.868	104.683	63.604	330.647	130.904	283.267	178.558	176.469		92.5286	83.8831	83.4606	54.493	62.0991	35.5725	64.5064	56.7351
	67.6201	107.457	66.4306	141.539	121.96	201.091	49.8416	391.474		81.2245	87.4555	63.0282	65.9258	35.0049	60.3101	55.5566	141.706
	77.9911	125.305	161.3	133.411	115.188	205.281	96.6141	339.866		110.468	91.1273	135.349	60.2178	57.3188	35.0345	88.9888	145.37
	83.8107	115.369	152.598	149.213	139.965	221.482	114.997	331.115		113.567	75.8411	116.953	67.1464	32.4752	64.902	82.3583
		103.47			158.399	291.143	176.069				103.67			58.183	35.1478	60.6297
							234.278									83.3328
	Cadherin-16									αSMA
	WT				LOX-1 KO					WT				LOX-1 KO
	ND+saline	HFD+saline	ND+Ang ll	HFD+Ang ll	ND+saline	HFD+saline	ND+Ang ll	HFD+Ang ll		ND+saline	HFD+saline	ND+Ang ll	HFD+Ang ll	ND+saline	HFD+saline	ND+Ang ll	HFD+Ang ll
	112.048	98.926	97.7716	95.099	85.2457	86.3933	86.1166	72.9547		109.757	72.67	137.321	196.076	193.421	157.215	72.3726	85.349
	87.9562	119.35	97.4761	71.266	148.495	83.5951	73.844	70.0368		76.7114	103.434	154.068	172.759	120.938	96.4921	93.4457	77.4271
	102.425	91.868	93.192	45.4099	65.1635	109.342	84.8603	52.5201		122.688	135.745	149.489	176.679	104.518	117.969	156.566	113.219
	102.509	82.2998	97.9455	51.9606	90.6394	77.766	85.7164	92.9591		135.463	80.5724	120.517	147.738	142.07	85.8664	107.401	81.9161
	84.8705	78.693	99.7655	58.3978	83.8846	66.2427	85.5911	116.022		62.8128	87.6912	153.196	180.342	135.523	79.1998	93.4581	104.35
	96.9279	81.8308	101.201	49.737	70.858	66.4752	77.8265	77.6302		66.1645	86.7629	167.062	176.69	96.6265	88.6745	62.2408	55.6155
	113.263	97.069	106.179	66.271	82.7064	68.3704	90.0655	67.8726		126.403	70.528	195.273	208.563	91.1128	114.061	108.506	85.3276
		97.2156			76.5704	70.1326	67.3127				88.4014			194.242	102.044	117.784
							85.1804									134.607
	Vimentin									p40phox
	WT				LOX-1 KO					WT				LOX-1 KO
	ND+saline	HFD+saline	ND+Ang ll	HFD+Ang ll	ND+saline	HFD+saline	ND+Ang ll	HFD+Ang ll		ND+saline	HFD+saline	ND+Ang ll	HFD+Ang ll	ND+saline	HFD+saline	ND+Ang ll	HFD+Ang ll
	112.976	106.14	132.575	183.011	136.548	176.225	99.5454	96.6592		109.676	157.571	104.105	207.375	98.2965	276.507	88.3187	198.288
	74.8437	72.2253	123.609	205.944	102.194	129.418	95.3187	93.7589		91.6593	126.229	92.1776	247.973	106.648	200.917	76.8405	187.607
	108.738	132.688	174.699	231.348	127.267	151.659	115.574	159.326		113.283	215.156	181.775	194.402	96.4595	91.68	76.1793	164.836
	133.504	90.9574	119.598	155.188	145.206	94.294	111.816	107.938		92.5515	119.711	90.4896	283.401	113.811	121.617	66.5938	186.506
	77.2941	70.1791	130.656	183.117	115.892	97.3874	108.657	122.851		93.9237	138.83	88.1792	314.8	101.731	115.815	73.0426	361.014
	74.4958	89.1176	142.648	144.79	109.982	106.84	71.8622	94.3523		89.312	137.978	127.833	163.27	105.645	118.395	78.6517	293.174
	118.148	74.3348	183.391	160.851	101.593	107.993	116.143	103.673		109.595	127.383	164.818	317.767	104.704	201.774	79.1093	287.221
		111.305			119.189	113.175	104.963				125.362			106.683	258.748	101.301
							120.118									122.629
	p47phox									NAGL
	WT				LOX-1 KO					WT				LOX-1 KO
	ND+saline	HFD+saline	ND+Ang ll	HFD+Ang ll	ND+saline	HFD+saline	ND+Ang ll	HFD+Ang ll		ND+saline	HFD+saline	ND+Ang ll	HFD+Ang ll	ND+saline	HFD+saline	ND+Ang ll	HFD+Ang ll
	93.532	129.332	78.821	174.506	72.6848	110.148	348.061	579.475		88.9027	106.805	105.667	239.016	279.15	211.633	202.548	115.689
	121.881	166.389	93.4964	128.648	76.0258	68.4796	401.242	426.615		75.5343	79.4519	132.875	151.86	101.866	62.0853	64.5997	84.8804
	97.3997	168.364	102.647	222.76	98.6244	67.3187	172.398	673.885		129.443	114.274	167.513	287.358	115.259	120.697	113.686	208.114
	87.7258	109.439	113.14	194.747	86.7155	172.958	357.229	390.164		108.858	128.326	139.514	153.023	142.457	131.891	150.557	141.175
	75.555	116.046	77.9415	164.261	99.4655	188.484	334.42	2110.35		83.1164	113.217	116.623	178.925	76.7776	93.2082	88.9964	155.303
	87.9494	122.368	146.038	137.621	80.581	245.565	272.157	1150.8		76.0999	70.4421	120.914	159.995	77.3257	188.001	153.23	112.31
	135.957	112.171	168.538	292.835	73.499	159.576	277.354	1310.38		138.046	105.472	119.821		115.514	144.508	113.694
		124.116			76.9065	123.213	308.921				98.2055			110.504	115.414	117.48
							455.226
	AT1a									AT1b
	WT				LOX-1 KO					WT				LOX-1 KO
	ND+saline	HFD+saline	ND+Ang ll	HFD+Ang ll	ND+saline	HFD+saline	ND+Ang ll	HFD+Ang ll		ND+saline	HFD+saline	ND+Ang ll	HFD+Ang ll	ND+saline	HFD+saline	ND+Ang ll	HFD+Ang ll
	97.1576	103.851	88.2739	123.513	52.934	56.9632	79.5884	62.7698		97.8964	168.993	116.357	103.418	75.4738	40.263	65.617	86.4201
	108.088	88.565	78.9267	96.6479	90.8468	64.8391	88.3501	72.8248		163.837	88.4308	105.762	86.5196	106.857	82.1564	52.856	50.5543
	91.0125	77.623	93.7296	79.3799	67.9128	73.0455	93.9057	75.8684		100.744	121.376	92.1495	160.177	29.7921	52.4982	109.754	25.7509
	90.5663	97.5318	101.955	80.4108	76.3472	62.6955	73.3048	76.0892		60.9415	97.8109	57.7648	130.491	60.44	74.4783	104.082	122.628
	102.707	97.7585	106.094	88.2329	72.7822	75.3819	61.6691	217.714		65.4806	105.854	104.664	90.1684	144.276	23.1915	115.56	60.188
	95.3209	80.1156	102.41	80.5531	96.0461	73.6614	75.6917	110.433		135.317	166.348	148.689	62.3663	141.507	127.004	101.339	52.9315
	115.147	77.2796	115.349	94.4522	73.2739	46.1971	71.0934	115.974		75.7829	253.143	209.304	85.4134	93.0023	61.3545	65.2355	39.2525
		89.1562			87.5951		80.7527				84.5942			83.2983	61.4439	67.3135
							97.5948									73.3094
	LOX-1
	WT
	ND+saline	HFD+saline	ND+Ang ll	HFD+Ang ll
	114.932	90.9157	72.6053	102.554
	119.327	75.7002	57.2776	57.1735
	113.004	96.0145	56.1503	58.9464
	92.1301	90.8636	85.4841	67.8872
	101.12	99.4382	80.8573	73.0144
	69.9026	96.8031	79.7961	64.0203
	89.5839	84.4458	111.385	79.8145
		97.6154

## Sheet: Figure 8-figure supplement 1b
	Relative gene expression normalized to GAPDH
	COX-2									E-cadherin
	WT				LOX-1 KO					WT				LOX-1 KO
	ND+saline	HFD+saline	ND+Ang ll	HFD+Ang ll	ND+saline	HFD+saline	ND+Ang ll	HFD+Ang ll		ND+saline	HFD+saline	ND+Ang ll	HFD+Ang ll	ND+saline	HFD+saline	ND+Ang ll	HFD+Ang ll
	111.602	128.71	129.213	221.724	152.948	221.755	97.64	431.13		104.908	109.24	112.173	79.4833	59.5457	42.9118	93.1457	162.907
	101.183	117.7	61.1079	126.986	115.278	261.561	63.6671	179.013		110.51	97.909	81.8355	56.9745	81.335	62.2707	99.9758	88.5733
	104.925	160.359	77.5891	123.027	248.957	109.273	109.317	130.237		86.793	118.341	97.295	78.7668	50.0729	59.8293	82.2907	97.9606
	152.868	104.683	130.111	172.767	130.904	283.267	256.911	144.312		92.5286	83.8831	84.4428	81.7984	62.0991	35.5725	104.228	107.043
	67.6201	107.457	103.241	166.994	121.96	201.091	138.318	206.198		81.2245	87.4555	78.4118	88.6646	35.0049	60.3101	99.5889	103.873
	77.9911	125.305	177.934	143.069	115.188	205.281	154.797	178.225		110.468	91.1273	92.4874	68.834	57.3188	35.0345	107.298	133.106
	83.8107	115.369			139.965	221.482	112.101	223.527		113.567	75.8411			32.4752	64.902	115.498	75.7916
		103.47			158.399	291.143					103.67			58.183	35.1478
	Cadherin-16									αSMA
	WT				LOX-1 KO					WT				LOX-1 KO
	ND+saline	HFD+saline	ND+Ang ll	HFD+Ang ll	ND+saline	HFD+saline	ND+Ang ll	HFD+Ang ll		ND+saline	HFD+saline	ND+Ang ll	HFD+Ang ll	ND+saline	HFD+saline	ND+Ang ll	HFD+Ang ll
	112.048	98.926	113.729	83.6002	85.2457	86.3933	107.603	135.234		109.757	72.67	87.3193	123.351	193.421	157.215	133.382	222.786
	87.9562	119.35	114.969	74.6132	148.495	83.5951	86.5836	106.975		76.7114	103.434	106.091	69.9467	120.938	96.4921	132.127	84.4646
	102.425	91.868	94.6039	80.4394	65.1635	109.342	89.6977	83.3487		122.688	135.745	44.9038	72.4188	104.518	117.969	109.108	100.103
	102.509	82.2998	86.1791	74.9072	90.6394	77.766	85.0798	88.2748		135.463	80.5724	119.672	61.7682	142.07	85.8664	124.402	55.404
	84.8705	78.693	111.245	69.1231	83.8846	66.2427	82.0889	116.248		62.8128	87.6912	82.5793	84.3485	135.523	79.1998	131.523	82.7833
	96.9279	81.8308	84.7878	73.1505	70.858	66.4752	91.6445	94.4023		66.1645	86.7629	150.366	103.154	96.6265	88.6745	105.006	90.496
	113.263	97.069			82.7064	68.3704	103.572	105.059		126.403	70.528			91.1128	114.061	115.161	80.0265
		97.2156			76.5704	70.1326					88.4014			194.242	102.044
	Vimentin									p40phox
	WT				LOX-1 KO					WT				LOX-1 KO
	ND+saline	HFD+saline	ND+Ang ll	HFD+Ang ll	ND+saline	HFD+saline	ND+Ang ll	HFD+Ang ll		ND+saline	HFD+saline	ND+Ang ll	HFD+Ang ll	ND+saline	HFD+saline	ND+Ang ll	HFD+Ang ll
	112.976	106.14	114.141	145.588	136.548	176.225	117.755	96.5185		109.676	157.571	114.4	375.256	98.2965	276.507	128.464	79.4052
	74.8437	72.2253	120.166	82.0558	102.194	129.418	86.3103	75.8565		91.6593	126.229	121.817	204.904	106.648	200.917	101.322	202.466
	108.738	132.688	61.9132	120.73	127.267	151.659	89.9459	87.2629		113.283	215.156	87.8117	293.168	96.4595	91.68	89.0564	208.474
	133.504	90.9574	89.7253	114.862	145.206	94.294	94.3941	105.95		92.5515	119.711	113.89	339.427	113.811	121.617	119.399	165.776
	77.2941	70.1791	112.833	93.3635	115.892	97.3874	126.72	106.045		93.9237	138.83	87.6285	285.756	101.731	115.815	148.855	173.102
	74.4958	89.1176	97.4496	119.355	109.982	106.84	94.409	81.8896		89.312	137.978	115.795	337.487	105.645	118.395	167.769	295.317
	118.148	74.3348			101.593	107.993	91.3481			109.595	127.383			104.704	201.774	70.2309	116.96
		111.305			119.189	113.175					125.362			106.683	258.748
	p47phox									NAGL
	WT				LOX-1 KO					WT				LOX-1 KO
	ND+saline	HFD+saline	ND+Ang ll	HFD+Ang ll	ND+saline	HFD+saline	ND+Ang ll	HFD+Ang ll		ND+saline	HFD+saline	ND+Ang ll	HFD+Ang ll	ND+saline	HFD+saline	ND+Ang ll	HFD+Ang ll
	93.532	129.332	108.006	298.132	72.6848	110.148	102.844	313.733		88.9027	106.805	61.1454	433.86	284.921	216.008	94.7593	88.8355
	121.881	166.389	81.6553	196.747	76.0258	68.4796	265.178	220.291		75.5343	79.4519	148.208	142.418	103.972	63.3689	60.1101	63.3246
	97.3997	168.364	81.3602	223.517	98.6244	67.3187	145.254	527.229		129.443	114.274	99.8058	177.511	117.641	123.192	71.4641	93.9452
	87.7258	109.439	106.895	187.436	86.7155	172.958	156.773	478.443		108.858	128.326	114.083	195.765	145.402	134.618	53.8238	136.966
	75.555	116.046	103.819	190.486	99.4655	188.484	102.678	75.1305		83.1164	113.217	227.966	78.8968	78.3649	95.1351	151.073	114.545
	87.9494	122.368	96.0641	156.446	80.581	245.565	356.443	519.306		76.0999	70.4421	95.864	167.56	78.9243	191.888	85.6393	112.834
	135.957	112.171			73.499	159.576	211.387	141.733		138.046	105.472			117.902	147.495	32.3254
		124.116			76.9065	123.213					98.2055			112.789	117.8
	AT1a									AT1b
	WT				LOX-1 KO					WT				LOX-1 KO
	ND+saline	HFD+saline	ND+Ang ll	HFD+Ang ll	ND+saline	HFD+saline	ND+Ang ll	HFD+Ang ll		ND+saline	HFD+saline	ND+Ang ll	HFD+Ang ll	ND+saline	HFD+saline	ND+Ang ll	HFD+Ang ll
	97.1576	103.851	118.875	74.5246	52.934	56.9632	99.9453	59.7071		97.8964	168.993	65.841	74.9431	75.4738	40.263	83.2039	214.404
	108.088	88.565	77.7403	63.3544	90.8468	64.8391	72.5351	57.0322		163.837	88.4308	135.196	55.5905	106.857	82.1564	36.4503	60.66
	91.0125	77.623	64.7061	58.0979	67.9128	73.0455	81.941	68.5131		100.744	121.376	92.2673	113.186	29.7921	52.4982	73.2509	38.5289
	90.5663	97.5318	98.2843	57.1263	76.3472	62.6955	82.8671	73.9397		60.9415	97.8109	45.6173	22.764	60.44	74.4783	128.361	80.3238
	102.707	97.7585	56.6559	75.8443	72.7822	75.3819	127.105	78.7708		65.4806	105.854	92.5083	48.0459	144.276	23.1915	133.879	128.096
	95.3209	80.1156	98.9666	73.0378	96.0461	73.6614	94.7145	109.5		135.317	166.348	63.0489	79.7836	141.507	127.004	49.4789	57.6456
	115.147	77.2796			73.2739	46.1971	123.193	76.7659		75.7829	253.143			93.0023	61.3545	150.542	78.0811
		89.1562			87.5951						84.5942			83.2983	61.4439
	LOX-1
	WT
	ND+saline	HFD+saline	ND+Ang ll	HFD+Ang ll
	114.932	90.9157	128.931	121.272
	119.327	75.7002	134.225	155.861
	113.004	96.0145	42.0503	144.061
	92.1301	90.8636	40.0299	134.921
	101.12	99.4382	60.1309	87.5276
	69.9026	96.8031	114.338
	89.5839	84.4458
		97.6154
