# Supplementary material for: Oxidized low-density lipoprotein potentiates angiotensin II-induced Gq activation through the AT1-LOX1 receptor complex
Source: eLife. 2025 Mar 25;13:RP98766. doi: 10.7554/eLife.98766 (PMC11936421; doi:10.7554/eLife.98766)
Supplement: Figure 8—source data 1. — Source data for Figure 8a and b. [file elife-98766-fig8-data1.xlsx]

## Sheet: Figure 8a
	Relative gene expression normalized to GAPDH
	p67phox									p91phox
	WT				LOX-1 KO					WT				LOX-1 KO
	ND+saline	HFD+saline	ND+Ang ll	HFD+Ang ll	ND+saline	HFD+saline	ND+Ang ll	HFD+Ang ll		ND+saline	HFD+saline	ND+Ang ll	HFD+Ang ll	ND+saline	HFD+saline	ND+Ang ll	HFD+Ang ll
	112.183	137.163	73.2105	222.546	93.3757	182.76	207.974	331.51		115.795	155.025	107.982	353.111	73.8354	202.924	84.3197	197.493
	102.55	141.201	103.125	242.756	99.277	70.3198	249.74	246.039		110.939	134.611	109.599	330.298	110.475	167.827	80.874	201.619
	98.1941	151.748	103.853	193.961	94.0374	118.754	223.139	345.782		103.882	156.275	171.818	230.782	81.0002	101.251	79.9018	162.35
	97.0142	130.041	99.3608	130.534	106.102	88.3968	235.82	342.041		95.0873	166.207	116.778	343.223	123.509	236.042	68.793	202.078
	86.103	109.843	90.6553	205.566	114.055	88.0324	279.007	820.474		90.6475	173.253	114.687	408.156	110.907	219.986	97.3979	542.37
	89.2855	154.504	124.397	140.248	105.73	111.756	208.765	552.875		75.4084	185.812	150.836	370.119	100.173	231.942	90.7301	343.198
	114.67	124.17	161.681	276.247	97.3094	173.988	200.006	572.727		108.24	172.322	216.368	365.464	86.8376	181.684	78.8714	371.946
		140.865			116.248	134.077	241.034				183.857			84.7905	255.814	98.3893
							299.869									116.795
	Fibronectin									Collagen-1
	WT				LOX-1 KO					WT				LOX-1 KO
	ND+saline	HFD+saline	ND+Ang ll	HFD+Ang ll	ND+saline	HFD+saline	ND+Ang ll	HFD+Ang ll		ND+saline	HFD+saline	ND+Ang ll	HFD+Ang ll	ND+saline	HFD+saline	ND+Ang ll	HFD+Ang ll
	79.1003	104.881	82.2919	129.053	42.4898	44.9535	71.1922	83.1218		99.1531	70.6954	113.466	192.226	63.9963	63.3394	52.1539	46.006
	128.197	76.8199	72.5371	156.246	71.968	57.8959	107.809	68.375		89.2473	98.5852	93.628	153.977	71.1528	50.5726	74.6419	47.4528
	116.74	133.314	142.53	139.023	77.799	49.3125	81.4439	196.507		105.511	90.7913	162.203	213.555	48.6406	89.3505	82.1381	49.7766
	92.5242	81.3255	70.8027	139.576	30.8437	28.1129	78.0346	51.2601		83.4674	71.1026	96.1112	196.742	41.7291	33.8941	71.1816	99.3091
	83.6048	72.886	86.6866	179.861	57.5127	28.0601	64.0554	101.19		89.0003	79.4586	105.279	225.766	52.128	42.461	41.0028	50.071
	78.3557	81.9333	123.296	126.174	83.1129	43.9487	70.6368	65.8461		99.395	85.9977	199.978	215.517	92.1071	45.84	51.5731	69.1316
	121.478	89.728	138.597	166.805	83.0238	64.6471	78.3023	112.681		134.226	80.2113	221.141		61.2947	65.2585	79.2102
		85.6494			70.9567	46.5296	142.481				80.9929			94.39	39.4706	101.538
							177.291									113.13
	Collagen-4									TGF-β
	WT				LOX-1 KO					WT				LOX-1 KO
	ND+saline	HFD+saline	ND+Ang ll	HFD+Ang ll	ND+saline	HFD+saline	ND+Ang ll	HFD+Ang ll		ND+saline	HFD+saline	ND+Ang ll	HFD+Ang ll	ND+saline	HFD+saline	ND+Ang ll	HFD+Ang ll
	110.639	92.5365	87.2978	150.972	57.4572	29.1761	85.3284	65.2449		115.647	83.7012	95.1916	292.332	113.734	152.914	78.1013	79.9407
	90.753	97.5381	94.4102	130.061	64.0965	71.6202	113.532	83.9776		97.1611	96.7814	115.475	176.695	109.891	59.4996	71.9205	77.7825
	108.412	83.0751	99.7788	136.794	107.335	64.9838	102.968	154.153		91.4802	124.18	121.61	177.579	119.336	60.4589	84.9744	102.154
	126.279	102.039	116.798	109.994	38.8677	57.77	97.3814	68.9769		124.79	101.907	115.03	154.489	95.5971	60.4295	71.5485	74.3045
	81.2476	79.0965	90.4323	108.095	51.4083	55.2898	65.3829	155.947		80.9028	104.37	106.465	201.298	101.672	109.354	61.1938	185.066
	84.9654	83.085	121.341	91.3879	51.8796	71.5646	87.8924	180.687		96.5361	100.268	175.254	159.938	116.796	114.215	72.0453	110.332
	97.7038	89.8905	92.17	139.335	65.395	81.5468	91.8453			93.4819	111.072	183.387	181.653	109.753	64.5054	67.3055	124.814
		78.9005			63.555	76.7165	106.044				121.85			116.561	115.501	91.9982
							116.452									99.1176
	IL-6									TNF-α
	WT				LOX-1 KO					WT				LOX-1 KO
	ND+saline	HFD+saline	ND+Ang ll	HFD+Ang ll	ND+saline	HFD+saline	ND+Ang ll	HFD+Ang ll		ND+saline	HFD+saline	ND+Ang ll	HFD+Ang ll	ND+saline	HFD+saline	ND+Ang ll	HFD+Ang ll
	74.5179	136.489	101.982	129.552	44.5186	128.412	1183.54	1777.82		69.9125	79.9158	63.089	155.218	59.5201	133.359	931.002	1399.64
	130.601	137.354	76.9713	164.89	39.5823	94.2759	1434.62	1484.89		104.258	141.59	75.3114	100.023	88.6162	86.9427	1184.33	1173.11
	114.157	176.948	68.5845	213.022	110.962	146.167	1161.26	1808.12		115.237	163.57	91.6933	231.221	58.1756	76.2813	428.312	1048.39
	112.417	151.268	68.1205	170.535	85.1718	75.7067	1610.81	1153.56		82.675	81.2497	68.0097	146.454	54.8155	71.4819	1204.37	873.955
	97.6441	164.786	179.164	153.013	112.945	89.5767	2016.45	2006.67		91.3077	85.9968	102.353	113.248	87.6646	61.4618	964.41	3670.72
	90.3423	75.8135	140.02	118.031	92.4456	159.423	426.628	1228.23		124.93	64.0751	122.223	128.816	63.1883	80.0754	688.655	1911.19
	80.3207	180.001	85.6378	189.69	65.0947	104.406	581.892	925.715		111.679	81.4566	110.217	205.969	33.4689	90.1613	593.59	2005.1
		97.9783			105.678	114.759	1243.15				116.109			89.865	53.6983	966.126
							1759.85									953.066
	IL1β									MCP-1
	WT				LOX-1 KO					WT				LOX-1 KO
	ND+saline	HFD+saline	ND+Ang ll	HFD+Ang ll	ND+saline	HFD+saline	ND+Ang ll	HFD+Ang ll		ND+saline	HFD+saline	ND+Ang ll	HFD+Ang ll	ND+saline	HFD+saline	ND+Ang ll	HFD+Ang ll
	136.885	92.4356	117.903	217.008	179.055	254.056	142.275	132.392		104.513	90.3326	186.309	302.69	153.019	130.407	197.249	107.994
	87.8679	147.46	202.653	201.364	176.977	144.889	72.8768	132.863		113.726	78.0131	262.149	268.541	133.14	154.004	91.4398	140.561
	92.2996	206.616	187.764	180.044	110.142	113.856	86.5873	75.465		85.9301	173.274	198.957	318.939	154.022	127.652	124.043	356.412
	106.728	95.5822	164.783	267.769	133.714	98.4263	115.53	107.31		94.4635	84.6339	134.382	255.886	96.3168	154.069	171.161	186.993
	68.5882	119.088	144.089	191.071	141.65	227.508	113.46	95.6804		113.931	115.706	208.669	245.798	99.3734	113.568	107.128	292.953
	63.095	107.357	147.423	175.785	162.374	181.069	97.6238	61.8927		70.6403	86.8328	222.847		78.1098	140.119	118.479	221.631
	144.536	121.838	214.044	327.714	107.573	163.298	112.876	52.1276		116.797	142.207			96.0566	114.16	182.194	317.249
		134.887			136.579	184.997	92.0007				103.499			124.403	132.572	206.713
							76.3565									229.659

## Sheet: Figure 8b
	Relative gene expression normalized to GAPDH
	p67phox									p91phox
	WT				LOX-1 KO					WT				LOX-1 KO
	ND+saline	HFD+saline	ND+Ang ll	HFD+Ang ll	ND+saline	HFD+saline	ND+Ang ll	HFD+Ang ll		ND+saline	HFD+saline	ND+Ang ll	HFD+Ang ll	ND+saline	HFD+saline	ND+Ang ll	HFD+Ang ll
	112.183	137.163	114.051	187.814	93.3757	182.76	144.648	310.42		115.795	155.025	109.269	219.931	73.8354	202.924	118.461	74.0659
	102.55	141.201	79.875	191.911	99.277	70.3198	232.517	112.763		110.939	134.611	87.2028	170.257	110.475	167.827	113.327	93.9401
	98.1941	151.748	83.2555	132.227	94.0374	118.754	138.971	259.969		103.882	156.275	90.7555	213.74	81.0002	101.251	88.7578	156.435
	97.0142	130.041	93.5776	244.149	106.102	88.3968	175.173	237.995		95.0873	166.207	90.7772	288.18	123.509	236.042	120.924	130.219
	86.103	109.843	95.4008	208.191	114.055	88.0324	183.151	139.952		90.6475	173.253	90.5937	262.106	110.907	219.986	149.964	88.7095
	89.2855	154.504	105.688	240.678	105.73	111.756	220.559	270.716		75.4084	185.812	115.651	246.521	100.173	231.942	114.56	213.948
	114.67	124.17			97.3094	173.988	114.842	127.607		108.24	172.322			86.8376	181.684	100.174	47.4794
		140.865			116.248	134.077					183.857			84.7905	255.814
	Fibronectin									Collagen-1a
	WT				LOX-1 KO					WT				LOX-1 KO
	ND+saline	HFD+saline	ND+Ang ll	HFD+Ang ll	ND+saline	HFD+saline	ND+Ang ll	HFD+Ang ll		ND+saline	HFD+saline	ND+Ang ll	HFD+Ang ll	ND+saline	HFD+saline	ND+Ang ll	HFD+Ang ll
	79.1003	104.881	156.941	106.514	42.4898	44.9535	82.9195	98.5737		99.1531	70.6954	118.467	137.406	63.9963	63.3394	90.0831	200.563
	128.197	76.8199	106.934	58.7792	71.968	57.8959	80.8571	41.7288		89.2473	98.5852	114.347	42.772	71.1528	50.5726	75.0913	86.1299
	116.74	133.314	34.8553	25.7556	77.799	49.3125	94.9802	86.3996		105.511	90.7913	25.651	37.6046	48.6406	89.3505	87.2559	56.3717
	92.5242	81.3255	123.681	43.3072	30.8437	28.1129	94.4795	68.6735		83.4674	71.1026	102.997	65.6664	41.7291	33.8941	77.4367	34.4352
	83.6048	72.886	35.5517	31.8974	57.5127	28.0601	149.034	39.7965		89.0003	79.4586	61.0868	26.207	52.128	42.461	132.973	61.2784
	78.3557	81.9333	132.238	44.8237	83.1129	43.9487	101.383	68.529		99.395	85.9977	156.559	77.043	92.1071	45.84	106.531	67.551
	121.478	89.728			83.0238	64.6471	94.5859	44.5315		134.226	80.2113			61.2947	65.2585	123.42	54.2988
		85.6494			70.9567	46.5296					80.9929			94.39	39.4706
	Collagen-4a									TGF-β
	WT				LOX-1 KO					WT				LOX-1 KO
	ND+saline	HFD+saline	ND+Ang ll	HFD+Ang ll	ND+saline	HFD+saline	ND+Ang ll	HFD+Ang ll		ND+saline	HFD+saline	ND+Ang ll	HFD+Ang ll	ND+saline	HFD+saline	ND+Ang ll	HFD+Ang ll
	110.639	92.5365	149.884	176.992	57.4572	29.1761	85.7862	46.0171		115.647	83.7012	124.037	203.756	113.734	152.914	130.89	149.798
	90.753	97.5381	108.132	96.4432	64.0965	71.6202	98.4858	88.294		97.1611	96.7814	135.278	115.796	109.891	59.4996	160.546	128.821
	108.412	83.0751	71.5914	85.9741	107.335	64.9838	84.9253	102.178		91.4802	124.18	84.0114	123.361	119.336	60.4589	110.128	121.8
	126.279	102.039	147.26	119.891	38.8677	57.77	100.73	93.6477		124.79	101.907	124.573	155.17	95.5971	60.4295	126.026	107.38
	81.2476	79.0965	101.439	119.653	51.4083	55.2898	114.941	73.2996		80.9028	104.37	110.028	124.324	101.672	109.354	130.174	125.263
	84.9654	83.085	184.308	124.846	51.8796	71.5646	115.781	127.576		96.5361	100.268	151.359	170.552	116.796	114.215	117.993	150.974
	97.7038	89.8905			65.395	81.5468	103.772	51.6852		93.4819	111.072			109.753	64.5054	133.116	80.5167
		78.9005			63.555	76.7165					121.85			116.561	115.501
	IL-6									TNF-α
	WT				LOX-1 KO					WT				LOX-1 KO
	ND+saline	HFD+saline	ND+Ang ll	HFD+Ang ll	ND+saline	HFD+saline	ND+Ang ll	HFD+Ang ll		ND+saline	HFD+saline	ND+Ang ll	HFD+Ang ll	ND+saline	HFD+saline	ND+Ang ll	HFD+Ang ll
	74.5179	136.489	170.702	58.6328	44.5186	128.412	286.182	1975.96		69.9125	79.9158	119.083	136.432	59.5201	133.359	234.27	1239.75
	130.601	137.354	21.0478	249.804	39.5823	94.2759	1128.85	145.277		104.258	141.59	51.7839	319.103	88.6162	86.9427	417.736	467.683
	114.157	176.948	98.634	76.3692	110.962	146.167	658.022	1008.31		115.237	163.57	81.1196	160.717	58.1756	76.2813	802.041	1300.86
	112.417	151.268	68.4175	79.3898	85.1718	75.7067	551.484	981.096		82.675	81.2497	90.7798	141.398	54.8155	71.4819	455.612	1281.05
	97.6441	164.786	100.943	120.737	112.945	89.5767	466.003	328.039		91.3077	85.9968	104.514	203.324	87.6646	61.4618	366.211	331.63
	90.3423	75.8135	50.8328	112.531	92.4456	159.423	1120.54	654.497		124.93	64.0751	55.7556	197.162	63.1883	80.0754	1008.68	1199.8
	80.3207	180.001			65.0947	104.406	168.55	538.852		111.679	81.4566			33.4689	90.1613	395.956	447.016
		97.9783			105.678	114.759					116.109			89.865	53.6983
	IL1β									MCP-1
	WT				LOX-1 KO					WT				LOX-1 KO
	ND+saline	HFD+saline	ND+Ang ll	HFD+Ang ll	ND+saline	HFD+saline	ND+Ang ll	HFD+Ang ll		ND+saline	HFD+saline	ND+Ang ll	HFD+Ang ll	ND+saline	HFD+saline	ND+Ang ll	HFD+Ang ll
	136.885	92.4356	146.374	436.475	179.055	254.056	124.856	239.462		104.513	90.3326	101.742	266.504	153.019	130.407	109.749	257.383
	87.8679	147.46	164.908	188.504	176.977	144.889	68.1557	189.892		113.726	78.0131	91.9976	91.4393	133.14	154.004	131.108	208.763
	92.2996	206.616	104.083	373.733	110.142	113.856	139.276	166.195		85.9301	173.274	66.4985	229.145	154.022	127.652	128.316	187.968
	106.728	95.5822	173.26	785.303	133.714	98.4263	149.729	115.34		94.4635	84.6339	82.5091	123.94	96.3168	154.069	134.045	117.21
	68.5882	119.088	201.158	217.787	141.65	227.508	166.763	194.365		113.931	115.706	72.5293	144.095	99.3734	113.568	198.131	169.353
	63.095	107.357	64.5262	701.07	162.374	181.069	168.377	597.875		70.6403	86.8328	108.137	141.876	78.1098	140.119	229.855	300.254
	144.536	121.838			107.573	163.298	126.552	240.07		116.797	142.207			96.0566	114.16	141.001	183.629
		134.887			136.579	184.997					103.499			124.403	132.572
