# Supplementary material for: Oxidized low-density lipoprotein potentiates angiotensin II-induced Gq activation through the AT1-LOX1 receptor complex
Source: eLife. 2025 Mar 25;13:RP98766. doi: 10.7554/eLife.98766 (PMC11936421; doi:10.7554/eLife.98766)
Supplement: Figure 9—figure supplement 1—source data 1. — Source data for quantitative analysis for Masson-Trichrome staining in Figure 9—figure supplement 1a. [file elife-98766-fig9-figsupp1-data1.xlsx]

## Sheet: Figure 9-figure supplement 1
	Blue stained area/total area
	WT						LOX-1 KO
	ND+saline	HFD+saline	ND+Ang ll 0.1γ	HFD+Ang ll 0.1γ	ND+Ang ll 0.7γ	HFD+Ang ll 0.7γ	ND+saline	HFD+saline	ND+Ang ll 0.1γ	HFD+Ang ll 0.1γ	ND+Ang ll 0.7γ	HFD+Ang ll 0.7γ
	0.036819	0.0375071	0.0513249	0.0179773	0.0180991	0.0198477	0.0337642	0.027624	0.0341698	0.0204553	0.0317393	0.0176842
	0.0333764	0.0350091	0.0173562	0.0361592	0.0189837	0.0210196	0.0241472	0.0244552	0.0175479	0.0170292	0.0207904	0.0302398
	0.0290628	0.0249559	0.0292349	0.0399198	0.0274677	0.0268958	0.0168361	0.0320777	0.0188375	0.0164481	0.0460905	0.0327969
	0.0195913	0.0224494	0.0398307	0.022882	0.0247419	0.0228088	0.0162283	0.0219912	0.0421545	0.023457	0.0290027	0.0394962
	0.0369646	0.0251783	0.0572017	0.0405016	0.028281	0.0190481	0.0333957	0.0298533	0.0209646	0.0245577	0.0246583	0.0194178
	0.023406	0.0133659	0.034054	0.0286997	0.0182063	0.0180885	0.00955437	0.0248045	0.00842709	0.0263333	0.0237107	0.0196328
	0.0211369	0.0269576	0.0309814	0.0268818	0.02218	0.0212285	0.0384827	0.0206821	0.014033		0.0303492	0.0216934
		0.0397985	0.0270999	0.0290198			0.0363087	0.0425571			0.0260189
				0.0205994							0.0285578
